# Supplementary material for: Bending contorted hexabenzocoronene into a bowl
Source: Royal Society of Chemistry journal article supplement (doi:10.1039/c0sc00470g), 2010-10-12
Supplement: c0sc00470g.pdf [file c0sc00470g.pdf]

## **Bending Contorted Hexabenzocoronene into a Bowl**

Adam C. Whalley<sup>1</sup>, Kyle N. Plunkett<sup>2</sup>, Alon A. Gorodetsky<sup>1</sup>, Christine L. Schenck<sup>1</sup>,  
Chien-Yang Chiu<sup>1</sup>, Michael L. Steigerwald<sup>1\*</sup>, and Colin Nuckolls<sup>1\*</sup>

<sup>1</sup>*Department of Chemistry, Columbia University, New York, NY*

<sup>2</sup>*Department of Chemistry, Southern Illinois University, Carbondale, IL*

AUTHOR EMAIL ADDRESS: cn37@columbia.edu; mls2064@columbia.edu

### **Table of Contents**

|                                                  |          |
|--------------------------------------------------|----------|
| 1. DFT calculated HOMO and LUMO levels           | pg 2     |
| 2. DFT state summaries and structure coordinates | pg 3-16  |
| 3. Cyclic voltammetry                            | pg 17-18 |
| 4. Fluorescence quenching data                   | pg 19    |
| 5. General synthetic procedures                  | pg 20-42 |
| 6. Variable temperature NMR                      | pg 43-44 |
| 7. References                                    | pg 45    |

## 1. DFT Calculated HOMO and LUMO Energies

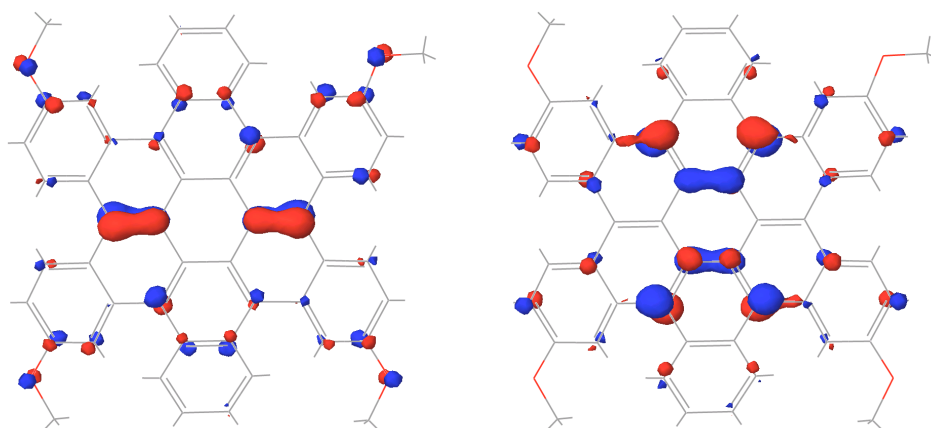

**Figure 1.** Tetramethoxy-HBC HOMO (left) and LUMO (right)

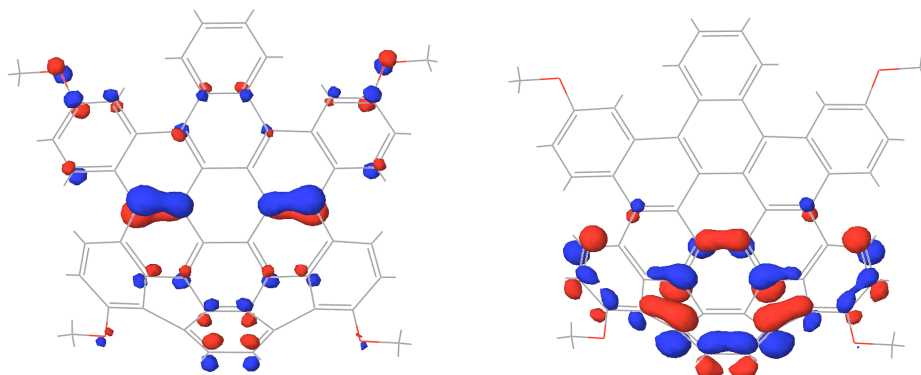

**Figure 2.** 2-closed tetramethoxy-HBC HOMO (left) and LUMO (right)

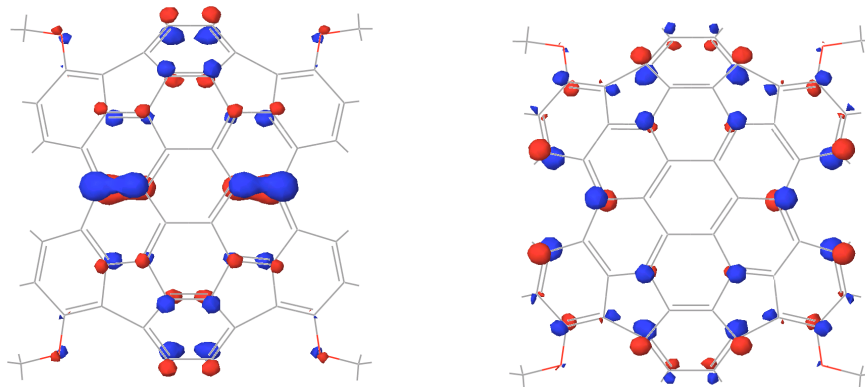

**Figure 3.** 4-closed tetramethoxy-HBC HOMO (left) and LUMO (right)

## 2. DFT state summaries and structure coordinates

B3LYP with the 631G\*\* basis set using the Jaguar software package Version 7.0, Schrödinger, LLC, New York, NY, 2007

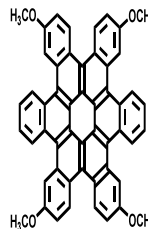

### Tetramethoxy HBC State Summary

---

Excited State 1: 2.6568 eV 466.67 nm

orbitals in  
excitation CI coeff.

-----  
188 => 189 0.81518  
187 => 190 0.54942

Transition dipole moment (debye):

X= -0.9135 Y= 1.0194 Z= 1.5396 Tot= 2.0601

Oscillator strength, f= 0.0428

---

Excited State 2: 2.8410 eV 436.41 nm

orbitals in  
excitation CI coeff.

-----  
187 => 189 0.62610  
188 => 189 0.10443  
188 => 190 -0.76229

Transition dipole moment (debye):

X= 0.8667 Y= 0.1540 Z= 0.8281 Tot= 1.2086

Oscillator strength, f= 0.0157

---

Excited State 3: 2.9702 eV 417.42 nm

orbitals in  
excitation CI coeff.

-----  
186 => 189 0.21148  
186 => 190 -0.42915  
187 => 191 -0.10439  
188 => 191 -0.85244

Transition dipole moment (debye):

X= -0.1755 Y= 0.0402 Z= 0.0064 Tot= 0.1801

Oscillator strength, f= 0.0004

---

Excited State 4: 3.0248 eV 409.90 nm

orbitals in  
excitation CI coeff.

|            |          |
|------------|----------|
| 186 => 189 | -0.73990 |
| 186 => 190 | -0.15463 |
| 187 => 191 | 0.60184  |
| 188 => 191 | -0.17957 |

Transition dipole moment (debye):

X= 0.2766 Y= 0.0349 Z= 0.2323 Tot= 0.3629

Oscillator strength, f= 0.0015

---

Excited State 5: 3.3089 eV 374.70 nm

orbitals in  
excitation CI coeff.

|            |          |
|------------|----------|
| 187 => 189 | 0.72286  |
| 188 => 190 | 0.58699  |
| 183 => 191 | -0.12506 |
| 184 => 191 | -0.11807 |
| 186 => 191 | 0.17391  |

Transition dipole moment (debye):

X= -7.5281 Y= -0.6581 Z= -4.3219 Tot= 8.7054

Oscillator strength, f= 0.9509

---

Excited State 6: 3.3579 eV 369.23 nm

orbitals in  
excitation CI coeff.

|            |          |
|------------|----------|
| 185 => 189 | -0.10380 |
| 186 => 189 | 0.21687  |
| 188 => 189 | 0.33939  |
| 186 => 190 | -0.49536 |
| 187 => 190 | -0.57834 |
| 186 => 191 | 0.21113  |

187 => 191 0.19198  
188 => 191 0.29400

Transition dipole moment (debye):

X= -2.5030 Y= 2.5371 Z= 4.3187 Tot= 5.5994

Oscillator strength, f= 0.3992

### Tetramethoxy HBC DFT Summary

Final total energy = -2301.78854791482 h

final geometry:

| angstroms |               |               |               |
|-----------|---------------|---------------|---------------|
| atom      | x             | y             | z             |
| C1        | 0.0371379519  | 0.0049513063  | -0.0087638074 |
| C2        | 0.0177611003  | -0.0203845638 | 1.4072292708  |
| C3        | 1.2657266490  | -0.0472208330 | 2.0999525826  |
| C4        | 2.4601878407  | -0.0703966666 | 1.3376593353  |
| C5        | 2.4431047154  | -0.0828092989 | -0.0418530439 |
| C6        | 1.2173773643  | -0.0389094880 | -0.7230900844 |
| C7        | 1.2845038129  | 0.1227871344  | 3.5365566010  |
| C8        | 0.1475920760  | 0.6752111740  | 4.1478658927  |
| C9        | -1.1213411968 | 0.6483134165  | 3.4650333927  |
| C10       | -1.2102597530 | 0.1161705871  | 2.1663194463  |
| C11       | -2.2956985488 | 1.1574199063  | 4.1208882629  |
| C12       | -2.1964727693 | 1.7273238638  | 5.4406655951  |
| C13       | -0.9173137679 | 1.7930373819  | 6.1010130134  |
| C14       | 0.2516534991  | 1.2618345726  | 5.4555475847  |
| C15       | -3.3430085381 | 2.2184653544  | 6.0847972492  |
| C16       | -3.2889461718 | 2.4097629799  | 7.5178088421  |
| C17       | -2.0195495161 | 2.4911058121  | 8.1660850540  |
| C18       | -0.8124438168 | 2.3665668559  | 7.3793227660  |
| C19       | -4.4546617640 | 2.3753063156  | 8.3236327684  |
| C20       | -4.3918691543 | 2.4537966063  | 9.6992293297  |
| C21       | -3.1442502496 | 2.5369985800  | 10.3362906121 |
| C22       | -1.9889115061 | 2.5380878759  | 9.5825736794  |
| C23       | 1.4996152651  | 1.3156385886  | 6.1035838127  |
| C24       | 1.6559359427  | 2.2586811429  | 7.1897361531  |
| C25       | 0.4983985166  | 2.7871307982  | 7.8319387346  |
| C26       | -3.5434098693 | 1.0886455698  | 3.4761980276  |
| C27       | -4.6154021786 | 1.9265899182  | 3.9723180265  |
| C28       | -4.5149751628 | 2.5002260904  | 5.2786694404  |
| C29       | 2.4148927886  | -0.2118093191 | 4.3768728231  |
| C30       | 2.5369061425  | 0.4136947660  | 5.6517669548  |
| C31       | 0.6541016552  | 3.8017190877  | 8.8091932853  |
| C32       | 1.9041283148  | 4.2818351965  | 9.1541840581  |
| C33       | 3.0491407734  | 3.7687862527  | 8.5145444941  |
| C34       | 2.9184782403  | 2.7934593311  | 7.5549728007  |

|     |               |               |               |
|-----|---------------|---------------|---------------|
| C35 | -2.5142702225 | -0.2769827290 | 1.6748136241  |
| C36 | -3.6799312550 | 0.1934007727  | 2.3486506942  |
| C37 | -5.4995208274 | 3.4190986746  | 5.6941708820  |
| C38 | -6.5674294430 | 3.7657524570  | 4.8829224956  |
| C39 | -6.6683227164 | 3.2112166820  | 3.5956829121  |
| C40 | -5.7033985312 | 2.3232191324  | 3.1623118218  |
| C41 | 3.6037686902  | -0.0026399661 | 6.4907434488  |
| C42 | 4.4954456337  | -0.9759657431 | 6.1095076244  |
| C43 | 4.3585607004  | -1.6051654361 | 4.8567078104  |
| C44 | 3.3309520075  | -1.2300052385 | 4.0107088186  |
| C45 | -2.6603679307 | -1.2211425367 | 0.6253584196  |
| C46 | -3.9039938582 | -1.6891500663 | 0.2445999200  |
| C47 | -5.0532566343 | -1.2522542490 | 0.9309457442  |
| C48 | -4.9327785095 | -0.3475640501 | 1.9571284863  |
| H1  | 3.8030814539  | 2.4735864869  | 7.0183002230  |
| H2  | 4.0159610734  | 4.1938199744  | 8.7634126091  |
| O1  | 2.1276051206  | 5.2735048836  | 10.0561617508 |
| H3  | -0.2288272126 | 4.2582519424  | 9.2286794468  |
| H4  | -1.7744753899 | -1.6369098397 | 0.1722924437  |
| O2  | -4.1182616303 | -2.6028533288 | -0.7382531135 |
| H5  | -6.0134270213 | -1.6783243135 | 0.6589547845  |
| H6  | -5.8186577210 | -0.0876762360 | 2.5210997731  |
| H7  | 3.6778824731  | 0.3993966949  | 7.4925786855  |
| H8  | 5.2833977676  | -1.3138563053 | 6.7745884207  |
| O3  | 5.2573906743  | -2.5890375251 | 4.5924822352  |
| H9  | 3.1745808885  | -1.7587100786 | 3.0820312911  |
| H10 | -5.7535232298 | 1.9784530246  | 2.1376695724  |
| H11 | -7.4642645074 | 3.5021931408  | 2.9204954492  |
| O4  | -7.4402549768 | 4.6781711405  | 5.3949905718  |
| H12 | -5.4103540505 | 3.9408412223  | 6.6371484847  |
| H13 | 3.4116668042  | -0.0072963557 | 1.8506902351  |
| H14 | 3.3781477108  | -0.0755432211 | -0.5951311423 |
| H15 | 1.1951878847  | 0.0059761783  | -1.8084331924 |
| H16 | -0.8949628947 | 0.1267879522  | -0.5449318999 |
| H17 | -5.4164118578 | 2.2203399009  | 7.8521182093  |
| H18 | -5.3050044475 | 2.4049415004  | 10.2858148875 |
| H19 | -3.0836058192 | 2.5518524912  | 11.4210110933 |
| H20 | -1.0321503070 | 2.5055080434  | 10.0882820319 |
| C49 | -8.5121371221 | 5.1210646161  | 4.5800174229  |
| H21 | -9.0692754525 | 5.8424951584  | 5.1798634096  |
| H22 | -8.1535316610 | 5.6152307282  | 3.6677756800  |
| H23 | -9.1803135665 | 4.2962412465  | 4.3004501046  |
| C50 | -3.0007028509 | -3.1014909378 | -1.4518998556 |
| H24 | -3.4001523835 | -3.7849463929 | -2.2028469101 |
| H25 | -2.4490326960 | -2.2958658094 | -1.9533114108 |
| H26 | -2.3122395249 | -3.6498364293 | -0.7961948719 |
| C51 | 1.0112288673  | 5.8760321966  | 10.6878505283 |
| H27 | 1.4160618880  | 6.6246709233  | 11.3706207727 |
| H28 | 0.3529260987  | 6.3694317528  | 9.9613995233  |

|     |              |               |               |
|-----|--------------|---------------|---------------|
| H29 | 0.4253936712 | 5.1451698287  | 11.2599408070 |
| C52 | 5.1477939345 | -3.2906756258 | 3.3669176356  |
| H30 | 5.9628669317 | -4.0159642994 | 3.3579218652  |
| H31 | 4.1911857554 | -3.8231055824 | 3.2895945163  |
| H32 | 5.2521600002 | -2.6186663196 | 2.5054384374  |

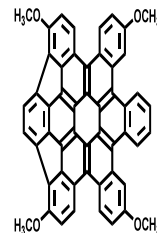

## 2-closed Tetramethoxy HBC State Summary

---

Excited State 1: 2.4235 eV 511.59 nm

orbitals in  
excitation CI coeff.

|            |         |
|------------|---------|
| 186 => 187 | 0.95099 |
| 184 => 188 | 0.21165 |
| 185 => 188 | 0.10492 |

Transition dipole moment (debye):

X= 1.2643 Y= 0.1185 Z= 2.3427 Tot= 2.6647

Oscillator strength, f= 0.0653

---

Excited State 2: 2.5559 eV 485.10 nm

orbitals in  
excitation CI coeff.

|            |          |
|------------|----------|
| 183 => 187 | 0.20531  |
| 184 => 187 | -0.94139 |
| 185 => 187 | -0.21123 |
| 186 => 188 | -0.11384 |

Transition dipole moment (debye):

X= -0.0081 Y= 0.0060 Z= -0.0949 Tot= 0.0955

Oscillator strength, f= 0.0001

---

Excited State 3: 2.6354 eV 470.45 nm

orbitals in  
excitation CI coeff.

184 => 187 0.15762  
185 => 187 -0.88850  
186 => 188 0.39859

Transition dipole moment (debye):

X= -1.2786 Y= -0.2945 Z= 0.7040 Tot= 1.4890

Oscillator strength, f= 0.0222

---

Excited State 4: 2.8096 eV 441.29 nm

orbitals in  
excitation CI coeff.

-----  
186 => 187 0.10896  
184 => 188 -0.14056  
185 => 188 -0.58219  
186 => 189 -0.77859

Transition dipole moment (debye):

X= -0.2733 Y= 0.1860 Z= 0.1726 Tot= 0.3729

Oscillator strength, f= 0.0015

---

Excited State 5: 2.8757 eV 431.14 nm

orbitals in  
excitation CI coeff.

-----  
183 => 187 0.41426  
184 => 187 0.22684  
185 => 187 -0.25801  
186 => 188 -0.74236  
184 => 189 0.23415  
185 => 189 0.26875

Transition dipole moment (debye):

X= -3.2004 Y= -0.9628 Z= 1.7815 Tot= 3.7872

Oscillator strength, f= 0.1564

---

Excited State 6: 3.0643 eV 404.60 nm

orbitals in  
excitation CI coeff.

-----



183 => 187 0.82648  
184 => 187 0.11257  
185 => 187 0.15276  
186 => 188 0.33900  
184 => 189 -0.32081  
184 => 192 -0.10297

Transition dipole moment (debye):

X= 2.6440 Y= 0.6746 Z= -1.3580 Tot= 3.0480

Oscillator strength, f= 0.1080

---

Excited State 7: 3.1840 eV 389.40 nm

orbitals in  
excitation CI coeff.

-----  
182 => 187 -0.25164  
183 => 188 0.25488  
184 => 188 -0.77827  
185 => 188 0.44711  
186 => 189 -0.15429

Transition dipole moment (debye):

X= -0.3607 Y= 0.0759 Z= -0.5292 Tot= 0.6450

Oscillator strength, f= 0.0050

---

Excited State 8: 3.3360 eV 371.66 nm

orbitals in  
excitation CI coeff.

-----  
181 => 187 0.16956  
183 => 187 0.18672  
185 => 187 0.14462  
183 => 188 -0.20471  
184 => 188 0.11569  
185 => 188 0.19836  
184 => 189 0.69750  
185 => 189 -0.48426  
186 => 189 -0.18243

Transition dipole moment (debye):

X= 0.6953 Y= 0.8196 Z= -2.1309 Tot= 2.3866

Oscillator strength, f= 0.0721

## 2-closed Tetramethoxy HBC DFT Summary

Final total energy = -2299.36499902024 h

final geometry:

| angstroms |               |               |               |
|-----------|---------------|---------------|---------------|
| atom      | x             | y             | z             |
| C1        | -0.1008298469 | 0.1070592417  | 0.0351178025  |
| C2        | -0.0598262327 | 0.1247587130  | 1.4387277060  |
| C3        | 1.2074030069  | 0.0108926804  | 2.1048685516  |
| C4        | 2.3605452215  | -0.0501808007 | 1.2907884313  |
| C5        | 2.3029741970  | -0.0154664244 | -0.0956275859 |
| C6        | 1.0507622086  | 0.0543290100  | -0.7325606386 |
| C7        | -1.2942699956 | 0.1695812016  | 2.2037421784  |
| C8        | -1.2691400002 | -0.3786474505 | 3.4901387440  |
| C9        | 0.0117102671  | -0.5925069665 | 4.1326493566  |
| C10       | 1.2398049700  | -0.1711107083 | 3.5477649309  |
| C11       | -2.5179111661 | -0.6033639588 | 4.2033015107  |
| C12       | -3.7356489053 | -0.2774212522 | 3.5984761860  |
| C13       | -3.7337835420 | 0.5745005122  | 2.4310244629  |
| C14       | -2.5073635825 | 0.8028597276  | 1.7319469640  |
| C15       | -4.9444154947 | -0.7862902943 | 4.2265489889  |
| C16       | -4.9479540469 | -1.1161395958 | 5.6227500141  |
| C17       | -3.7060616538 | -1.0302221045 | 6.3749682867  |
| C18       | -2.5245997852 | -1.0357714594 | 5.5841874216  |
| C19       | -6.0763001210 | -1.0821551504 | 3.4476043302  |
| C20       | -7.2022513101 | -1.6790968553 | 3.9935373794  |
| C21       | -7.2386921462 | -1.9607952574 | 5.3715868183  |
| C22       | -6.1284880100 | -1.6782846329 | 6.1554919283  |
| C23       | -1.2569697108 | -1.2696066764 | 6.1847949957  |
| C24       | -1.1954453149 | -1.3769521031 | 7.5620108600  |
| C25       | -2.2913833820 | -1.0436614075 | 8.3793294666  |
| C26       | -3.5786477921 | -0.8978334869 | 7.8345998663  |
| C27       | -0.0255366125 | -1.0600619613 | 5.4775663016  |
| C28       | -2.4982039081 | 1.7739974292  | 0.6959828188  |
| C29       | -3.6346653437 | 2.4674436574  | 0.3371374168  |
| C30       | -4.8398402387 | 2.2367925012  | 1.0196909066  |
| C31       | -4.8785482744 | 1.3215631834  | 2.0502732994  |
| C32       | 1.1336863527  | -0.9942084267 | 6.2256786225  |
| C33       | 2.2744563018  | -0.3091798644 | 5.7701887598  |
| C34       | 2.3951612440  | 0.0876385386  | 4.4266051177  |
| C35       | 1.1605896381  | -0.9882834709 | 7.6388342791  |
| C36       | -0.0175113049 | -1.1691963698 | 8.3129042884  |
| C37       | -1.8062859765 | -0.5783199824 | 9.6442793245  |
| C38       | -2.7656836315 | -0.0353038089 | 10.4901941621 |
| C39       | -4.1214466855 | 0.0152801769  | 10.0404415542 |

|     |               |               |               |
|-----|---------------|---------------|---------------|
| C40 | -4.5209531523 | -0.3764825397 | 8.7668997127  |
| C41 | -0.2966212725 | -0.5871315192 | 9.5696257584  |
| C42 | 0.7911942273  | 0.0991072646  | 10.1376231736 |
| C43 | 2.0343635953  | 0.2782685305  | 9.4347152899  |
| C44 | 2.2338019522  | -0.2155685140 | 8.1334363487  |
| C45 | 3.0286653642  | 0.1439793670  | 6.8996832748  |
| C46 | 4.1369193058  | 0.9286619503  | 6.6078729274  |
| C47 | 4.3857629027  | 1.2663221948  | 5.2421895242  |
| C48 | 3.5456825513  | 0.8969918683  | 4.1957070642  |
| H49 | 3.7587141934  | 1.2987300334  | 3.2121910812  |
| H50 | 5.2363851857  | 1.8954891425  | 5.0070273642  |
| O51 | 4.8924163242  | 1.3680837688  | 7.6518775854  |
| H52 | -6.0587055424 | -0.9324058245 | 2.3758671715  |
| O53 | -8.1908658536 | -1.9808326564 | 3.0995633376  |
| H54 | -8.1014897415 | -2.4380477595 | 5.8211838304  |
| H55 | -6.1424894364 | -1.9761346247 | 7.1978360528  |
| H56 | 3.3262767795  | -0.1954320302 | 1.7594416005  |
| H57 | 3.2194664264  | -0.0892300754 | -0.6695493291 |
| O58 | 0.8445438271  | 0.0476349364  | -2.0834251196 |
| H59 | -1.0482226477 | 0.0918401484  | -0.4857775980 |
| H60 | -5.5525833861 | -0.2063403011 | 8.4793070225  |
| H61 | -4.8741395515 | 0.4329380237  | 10.6989647195 |
| O62 | -2.3460160260 | 0.4637181833  | 11.6854113192 |
| H63 | -1.5624758895 | 2.0259558041  | 0.2168953653  |
| H64 | -3.5824818586 | 3.2202857809  | -0.4441325492 |
| H65 | -5.7296874820 | 2.8072536195  | 0.7698214788  |
| H66 | -5.7907156547 | 1.2130391561  | 2.6214522402  |
| H67 | 0.6804329680  | 0.6151614665  | 11.0860596443 |
| H68 | 2.7801260950  | 0.9159870764  | 9.9003269052  |
| C69 | 6.0335774912  | 2.1743502679  | 7.3932702260  |
| H70 | 6.4793273457  | 2.3793410201  | 8.3676834892  |
| H71 | 6.7650841389  | 1.6492027719  | 6.7666845552  |
| H72 | 5.7615622623  | 3.1232561081  | 6.9142805053  |
| C73 | -3.2821193553 | 1.1213587045  | 12.5288078246 |
| H74 | -2.7135830564 | 1.4618357201  | 13.3950750022 |
| H75 | -3.7377871227 | 1.9863340756  | 12.0319078213 |
| H76 | -4.0725840731 | 0.4394331313  | 12.8653421607 |
| C77 | -9.2996074973 | -2.7456890142 | 3.5420778589  |
| H78 | -9.9185665402 | -2.9152579210 | 2.6593698018  |
| H79 | -8.9862482897 | -3.7136548885 | 3.9539147694  |
| H80 | -9.8918083524 | -2.2102689851 | 4.2955837898  |
| C81 | 1.9674954920  | 0.0028424166  | -2.9466385692 |
| H82 | 1.5670774865  | 0.0284464130  | -3.9615461192 |
| H83 | 2.6281887631  | 0.8673222721  | -2.7996892138 |
| H84 | 2.5488678198  | -0.9187713917 | -2.8133213185 |

#### 4-closed Tetramethoxy HBC State Summary

---

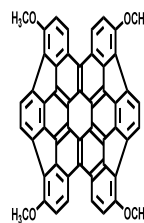

Excited State 1: 2.5007 eV 495.79 nm

orbitals in  
excitation CI coeff.

-----  
184 => 185 -0.96905  
182 => 187 -0.13711

Transition dipole moment (debye):

X= -0.1072 Y= -0.1557 Z= -0.1451 Tot= 0.2383

Oscillator strength, f= 0.0005

---

Excited State 2: 2.5311 eV 489.85 nm

orbitals in  
excitation CI coeff.

-----  
181 => 185 0.76468  
182 => 185 -0.22413  
183 => 185 0.42997  
182 => 186 -0.39577

Transition dipole moment (debye):

X= -0.0322 Y= 0.0000 Z= 0.0334 Tot= 0.0464

Oscillator strength, f= 0.0000

---

Excited State 3: 2.5745 eV 481.59 nm

orbitals in  
excitation CI coeff.

-----  
181 => 185 -0.17210  
182 => 185 -0.68603  
181 => 186 0.54179  
182 => 186 -0.15385  
183 => 186 0.35795

184 => 187 -0.17349

Transition dipole moment (debye):

X= -0.8287 Y= 0.0731 Z= 0.5350 Tot= 0.9891

Oscillator strength, f= 0.0096

---

Excited State 4: 2.6169 eV 473.77 nm

orbitals in

excitation CI coeff.

-----  
184 => 186 0.90100  
181 => 187 -0.20856  
183 => 187 -0.32060

Transition dipole moment (debye):

X= -0.9403 Y= 1.7635 Z= -1.7710 Tot= 2.6703

Oscillator strength, f= 0.0708

---

Excited State 5: 2.7370 eV 452.99 nm

orbitals in

excitation CI coeff.

-----  
183 => 185 -0.68583  
180 => 186 0.11235  
181 => 186 -0.14904  
182 => 186 -0.66780  
182 => 189 -0.10784

Transition dipole moment (debye):

X= -0.0507 Y= -0.0269 Z= 0.0209 Tot= 0.0611

Oscillator strength, f= 0.0000

---

Excited State 6: 2.7884 eV 444.64 nm

orbitals in

excitation CI coeff.

-----  
182 => 185 0.15761  
183 => 186 0.72821  
184 => 187 0.64828

Transition dipole moment (debye):

X= 1.3468 Y= -0.1408 Z= -0.8356 Tot= 1.5912

Oscillator strength, f= 0.0268

---

Excited State 7: 2.8219 eV 439.37 nm

orbitals in  
excitation CI coeff.

|            |          |
|------------|----------|
| 181 => 185 | 0.35679  |
| 182 => 185 | -0.44365 |
| 183 => 185 | -0.42800 |
| 181 => 186 | -0.42786 |
| 182 => 186 | 0.53860  |

Transition dipole moment (debye):

X= -0.4919 Y= 0.0334 Z= 0.3022 Tot= 0.5783

Oscillator strength, f= 0.0036

---

Excited State 8: 2.8329 eV 437.66 nm

orbitals in  
excitation CI coeff.

|            |          |
|------------|----------|
| 181 => 185 | 0.48098  |
| 182 => 185 | 0.35570  |
| 183 => 185 | -0.31014 |
| 181 => 186 | 0.67887  |
| 182 => 186 | 0.26607  |

Transition dipole moment (debye):

X= 0.5148 Y= -0.0631 Z= -0.3282 Tot= 0.6138

Oscillator strength, f= 0.0040

---

#### 4-closed Tetramethoxy HBC DFT Summary

Final total energy = -2296.8628662726 h

final geometry:

|      | angstroms |   |   |
|------|-----------|---|---|
| atom | x         | y | z |

|     |               |               |               |
|-----|---------------|---------------|---------------|
| C1  | -0.0012846909 | -0.0024764560 | -0.0017025373 |
| C2  | -0.0030736197 | -0.0024621520 | 1.4016167140  |
| C3  | 1.2795311048  | -0.0017025302 | 1.9882651960  |
| C4  | 2.4364981766  | -0.1118288351 | 1.2656565580  |
| C5  | 2.4674849997  | -0.2343186438 | -0.1394296042 |
| C6  | 1.2149348355  | -0.1161306683 | -0.7605210216 |
| C7  | 3.7983174358  | -0.8796874177 | -0.4238006574 |
| C8  | 4.3771148811  | -1.2379996396 | 0.8393853579  |
| C9  | 3.5457646743  | -0.7448072750 | 1.8661331726  |
| C10 | 4.4505723601  | -1.3472459100 | -1.5537378424 |
| C11 | 5.6051303933  | -2.1598349473 | -1.3690345316 |
| C12 | 6.0445471933  | -2.5844364897 | -0.1235631317 |
| C13 | 5.3944827483  | -2.1835241038 | 1.0813665839  |
| C14 | 3.5413072249  | -1.2869241770 | 3.1312778359  |
| C15 | 4.5600897561  | -2.2492316656 | 3.4287095296  |
| C16 | 5.5086278212  | -2.7346700883 | 2.4497126270  |
| C17 | 4.3793104496  | -2.8537058072 | 4.7130655768  |
| C18 | 5.2231647204  | -3.8907538879 | 5.0397619110  |
| C19 | 6.1013506381  | -4.4729761026 | 4.1036451264  |
| C20 | 6.3214197424  | -3.9144740084 | 2.8275896516  |
| C21 | 3.1471656093  | -2.7326715414 | 5.4851201773  |
| C22 | 2.0063284344  | -1.9991419052 | 5.0283484314  |
| C23 | 2.3081298559  | -1.1673755729 | 3.9028765044  |
| C24 | 1.2511106079  | -0.5239719661 | 3.2998305442  |
| C25 | 4.9663187138  | -4.8425678550 | 6.0492271369  |
| C26 | 3.8125402335  | -4.7282783272 | 6.7742098097  |
| C27 | 2.9354107195  | -3.6659818101 | 6.4740856710  |
| C28 | 1.6451942868  | -4.0278853691 | 6.9062798604  |
| C29 | 0.4919438508  | -3.3310436220 | 6.4949033662  |
| C30 | 0.6596653473  | -2.2615027137 | 5.4862048042  |
| C31 | -0.4413217329 | -1.6316382624 | 4.7221048050  |
| C32 | -0.0903241519 | -0.8130288700 | 3.6278886514  |
| C33 | 1.7178986279  | -5.3250424559 | 7.5161947240  |
| C34 | 3.1262816856  | -5.8284286927 | 7.3286284297  |
| C35 | 3.7878054271  | -7.0563224958 | 7.1769761246  |
| C36 | 4.9998070521  | -7.1776507422 | 6.4112099903  |
| C37 | 5.5921602036  | -6.0758316662 | 5.7749751632  |
| C38 | 6.4262189048  | -5.7978423632 | 4.5508937014  |
| C39 | 7.2031864640  | -4.7185779626 | 2.0447068710  |
| C40 | 7.6520191997  | -5.9559224292 | 2.4852928291  |
| C41 | 7.2369297886  | -6.5463830235 | 3.7129806646  |
| C42 | 0.5175439046  | -5.8658245199 | 7.9481435184  |
| C43 | -0.6694535154 | -5.1060646910 | 7.7393152973  |
| C44 | -0.6952660263 | -3.9139863204 | 7.0299831652  |
| C45 | -0.9161867101 | -0.4379774394 | 2.5163842007  |
| C46 | -2.2655216452 | -0.7327858731 | 2.6237851595  |
| C47 | -2.7096889897 | -1.4071148181 | 3.7961683949  |
| C48 | -1.8479874117 | -1.8610208399 | 4.7856317093  |
| H49 | 6.9017086152  | -3.2410821931 | -0.1151393392 |

|     |               |               |               |
|-----|---------------|---------------|---------------|
| H50 | 6.1504493177  | -2.5055479441 | -2.2395211833 |
| O51 | 3.9355408313  | -1.0282316571 | -2.7696053137 |
| O52 | 0.5390865465  | -7.0950711264 | 8.5251609442  |
| H53 | -1.6109478608 | -5.4863072504 | 8.1182248580  |
| H54 | -1.6611354682 | -3.4464045589 | 6.9104423473  |
| H55 | 7.5575681579  | -4.3972157114 | 1.0764779268  |
| H56 | 8.3214744924  | -6.5086741766 | 1.8363689166  |
| O57 | 7.5657772846  | -7.8062816916 | 4.0995489587  |
| H58 | -2.2981134991 | -2.4156304174 | 5.5951722834  |
| H59 | -3.7657388756 | -1.6233254815 | 3.9097400614  |
| O60 | -3.0731065794 | -0.3955094951 | 1.5847233816  |
| H61 | 5.3820653216  | -8.1795117688 | 6.2425887238  |
| H62 | 3.3325197242  | -7.9736414775 | 7.5389529306  |
| H63 | -0.9379211262 | -0.0372940518 | -0.5504909926 |
| H64 | 1.1242728223  | -0.2297251932 | -1.8369619642 |
| C65 | -4.4569111195 | -0.7028035199 | 1.6564475623  |
| H66 | -4.8906704875 | -0.3472551932 | 0.7207477154  |
| H67 | -4.6295101165 | -1.7823299561 | 1.7468327112  |
| H68 | -4.9421630389 | -0.1874030324 | 2.4945196713  |
| C69 | 4.6025675509  | -1.4810595185 | -3.9383006269 |
| H70 | 4.0263253339  | -1.0957489246 | -4.7805157361 |
| H71 | 5.6260215278  | -1.0900463207 | -3.9956988193 |
| H72 | 4.6313113637  | -2.5764171553 | -3.9920728707 |
| C73 | 8.4098077677  | -8.5862852911 | 3.2666740216  |
| H74 | 8.5360991896  | -9.5408111773 | 3.7795077423  |
| H75 | 7.9594393712  | -8.7627478843 | 2.2821049985  |
| H76 | 9.3930121142  | -8.1174883826 | 3.1358662657  |
| C77 | -0.6806507527 | -7.6645154569 | 8.9762629065  |
| H78 | -0.4207445204 | -8.6396496277 | 9.3901255411  |
| H79 | -1.1449386497 | -7.0547108942 | 9.7612547477  |
| H80 | -1.3946077373 | -7.7997812403 | 8.1544635162  |



**3. Cyclic Voltammetry** – See General Procedures for detailed experimental protocol.

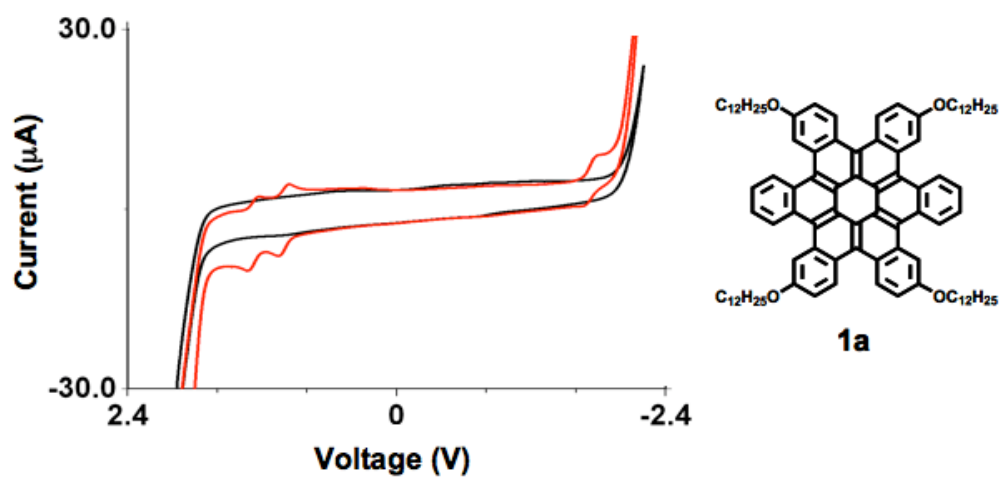

**Figure 4.** Cyclic voltammetry of compound **1a** (red). The background scan is shown in black.

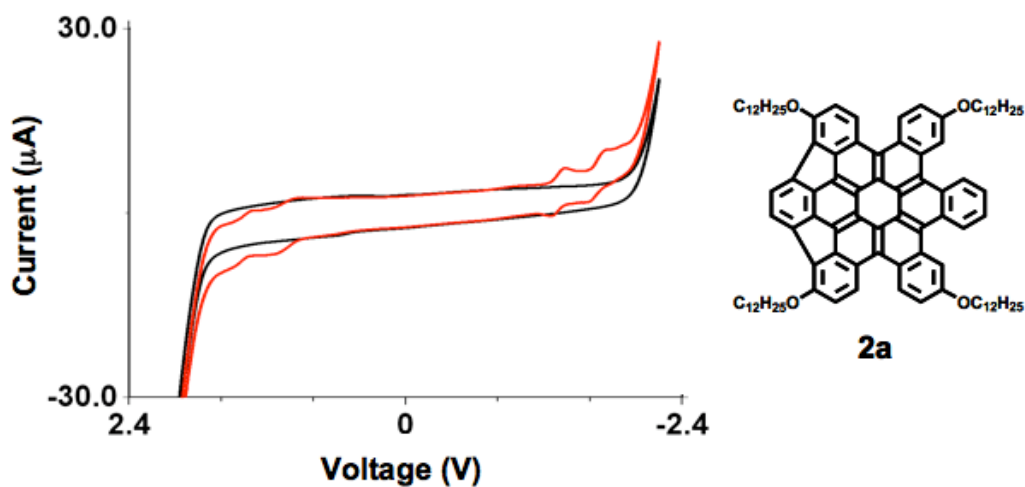

**Figure 5.** Cyclic voltammetry of compound **2a** (red). The background scan is shown in black.

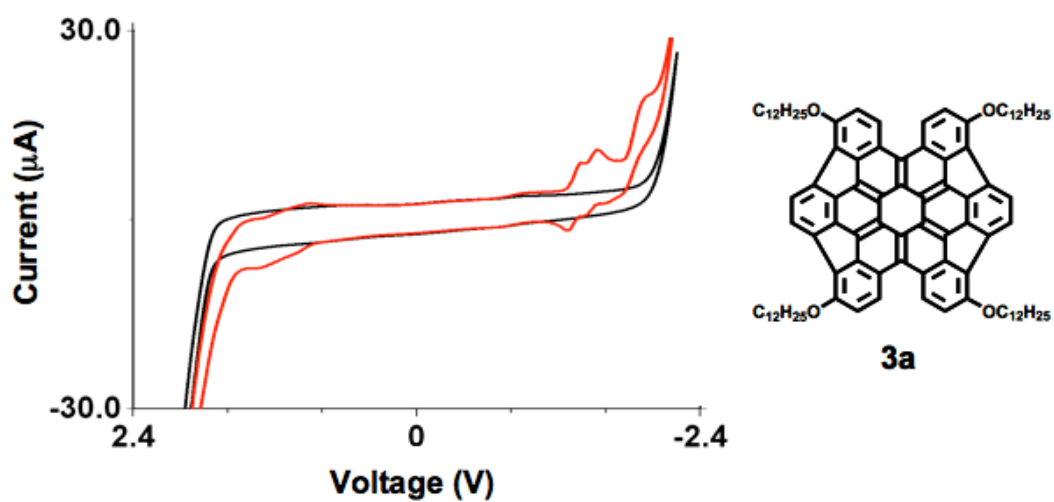

**Figure 6.** Cyclic voltammetry of compound **3a** (red). The background scan is shown in black.

#### 4. Fluorescence Quenching Data

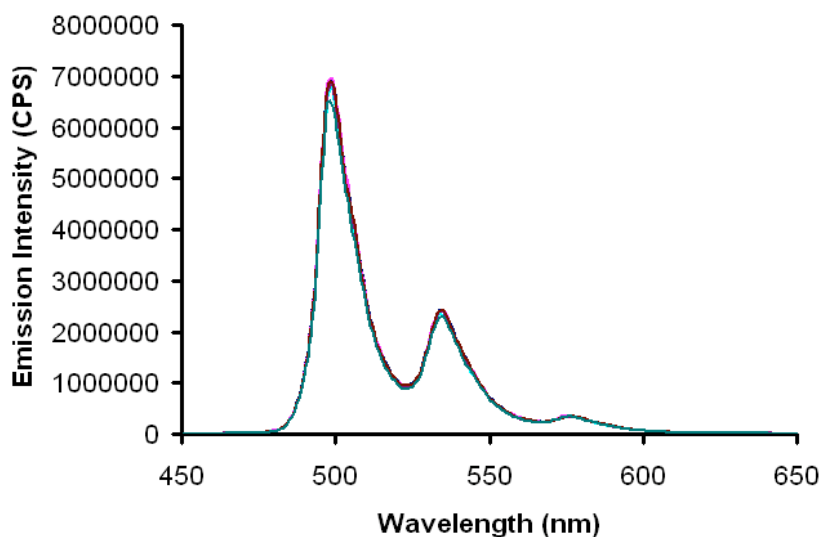

**Figure 7.** Emission spectra of **1a** ( $1.00 \times 10^{-6}$  M) excited at 379 nm with: (a) 0, (b) 0.25, (c) 0.50, (d) 0.75, (e) 1.0, and (f) 2.0 equivalents of  $C_{70}$  added. There is minimal difference between all spectra.

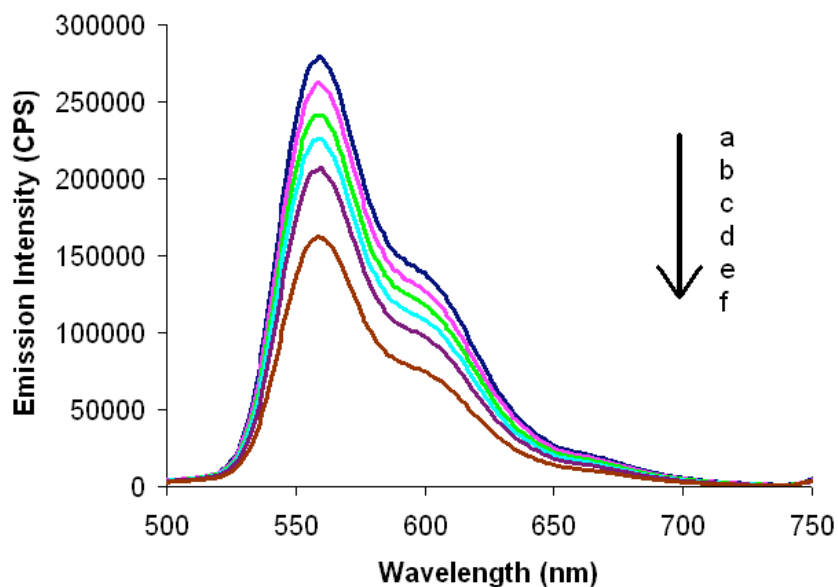

**Figure 8.** Emission spectra of **2a** ( $1.00 \times 10^{-6}$  M) excited at 377 nm with: (a) 0, (b) 0.25, (c) 0.5, (d) 0.75, (e) 1.0, and (f) 2.0 equivalents of  $C_{70}$  added.

## 5. General Procedures

Unless otherwise noted, all reagents were used as received and all reactions were carried out under an argon atmosphere. Column chromatography was performed on a CombiFlash® Rf system with Redisep normal phase silica columns (Teledyne ISCO Inc., Lincoln, NE). Microwave reactions were performed in a CEM Discover Labmate with Teflon capped tubes. An IR sensor and pressure sensor regulated the temperature and pressure, respectively. Millipore filtrations were accomplished with a 47 mm Millipore vacuum filter.  $^1\text{H}$  NMR and  $^{13}\text{C}$  NMR spectra were recorded on Bruker DRX-300 or Bruker DRX-400 spectrometers at room temperature, unless otherwise noted. High resolution mass spectra were recorded on a JEOL JMSHX110A/110A tandem mass spectrometer. A CH Instruments electrochemical workstation was used for the electrochemical measurements. Cyclic voltammetry experiments were performed in a single-compartment cell using a platinum wire auxiliary (BAS), a Ag/AgCl reference (BAS), and a glassy carbon working electrode (BAS). The supporting electrolyte was 0.1 M tetrabutylammonium tetrafluoroborate (Fluka) in anhydrous dichloromethane (Fluka). The working electrodes were polished on PSA microcloth (Buehler) with 1.0  $\mu\text{m}$  alumina micropolish and with 0.05  $\mu\text{m}$  alumina micropolish. The electrodes were then thoroughly sonicated in water, isopropanol, and dichloromethane to remove residual alumina particles. Prior to measurements, the electrochemical cell was degassed with argon. For experimental consistency, all reference electrodes were frequently standardized against the ferrocene/ferrocenium couple. POAV angles were measured using Mol2mol (<http://www.gunda.hu/mol2mol/index.html>). Inversion barriers were calculated using the formula  $\Delta G_c = 4.57 T_c \{9.97 + \log_{10}(T_c/\Delta\nu)\}$ , where  $T_c$  is the coalescence temperature measured where the two signals have merged, and  $\Delta\nu$  is the line width at half maximum of that signal in Hz. IUPAC naming was accomplished using the ACD/I-Lab Web service (ACD/IUPAC Name 8.05). All calculations were performed using Jaguar, version 7.0, Schrodinger, LLC, New York, NY, 2007. The B3LYP functional and 6-31G\*\* basis sets were used throughout.

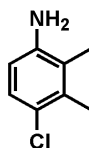

**4-chloro-2,3-dimethylaniline (S1).** In a 500 mL roundbottom flask, 2,3-dimethylaniline (40.0 g, 330 mmol) was added to 200 mL of anhydrous DMF. The mixture was cooled to 0 °C with an ice/water bath and N-chlorosuccinimide (44.1 g, 330 mmol) was added in one shot. The mixture was allowed to slowly warm to room temperature and was stirred at that temperature for 24 h. The mixture was diluted with water and extracted with  $\text{CH}_2\text{Cl}_2$ . The organic layer was then washed with water, dried over  $\text{MgSO}_4$ , and the solvent was removed under reduced pressure. The crude mixture was chromatographed on silica gel (1:1 hexane: $\text{CH}_2\text{Cl}_2$ ) to produce pure **1** (26.3 g, 51 %) as a clear liquid that browned quickly upon standing.  $^1\text{H}$  NMR (300 MHz,  $\text{CDCl}_3$ , ppm)  $\delta$  7.06 (d,  $J$  = 8.7 Hz, 1H), 6.53 (d,  $J$  = 8.4 Hz, 1H), 3.59 (bs, 2H), 2.36 (s, 3H), 2.14 (s, 3H).  $^{13}\text{C}$  NMR (75 MHz,  $\text{CDCl}_3$ , ppm).  $\delta$  143.7, 134.9, 127.1, 124.6, 123.1, 114.3, 17.35, 14.25. HRMS (EI+): calcd. for  $\text{C}_8\text{H}_{10}\text{NCl}$ : 155.0502, found: 155.0510.

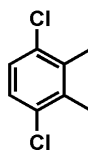

**1,4-dichloro-2,3-dimethylbenzene (S2).** In a 1000 mL Erlenmeyer flask, a mixture of conc. HCl (35 mL) and **S1** (25.3 g, 163 mmol) was cooled to 0 °C by the addition of ice water. Sodium nitrite (11.2 g, 163 mmol) in water (26 mL) was cautiously added to the mixture while the temperature was kept below 10 °C by the addition of ice. In a separate 1000 mL Erlenmeyer flask, copper (I) chloride (16.1 g, 163 mmol) was dissolved in conc. HCl (15 mL). The solution of the diazonium salt was poured slowly into the copper (I) chloride solution and the resulting mixture was allowed to stir for 1 h. The solution was extracted with CH<sub>2</sub>Cl<sub>2</sub> and the combined organic layers were dried over MgSO<sub>4</sub> and the solvent was removed under reduced pressure. Chromatography on silica gel eluting with hexane produced the desired product **2** (7.86 g, 28 %) as a clear oil that solidified on standing. <sup>1</sup>H NMR (300 MHz, CDCl<sub>3</sub>, ppm) δ 7.14 (s, 2H), 2.37 (s, 6H), 3.59 (bs, 2H), 2.36 (s, 3H), 2.14 (s, 3H). <sup>13</sup>C NMR (75 MHz, CDCl<sub>3</sub>, ppm) δ 136.6, 133.3, 127.7, 17.9. HRMS (EI<sup>+</sup>): calcd. for C<sub>8</sub>H<sub>8</sub>Cl<sub>2</sub>: 174.0003, found: 173.9994.

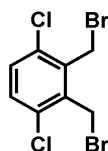

**1,4-dichloro-2,3-bis(dibromomethyl)benzene (S3).** In a flame dried 250 mL roundbottom flask equipped with a reflux condenser, CCl<sub>4</sub> (100 mL) was degassed by bubbling with argon for 15 minutes. **S2** (4.50 g, 25.7 mmol), NBS (13.7 g, 77.1 mmol) and benzoyl peroxide (311 mg, 1.29 mmol) were added and the reaction was refluxed overnight. After cooling, water (100 mL) was added and the mixture was extracted with CH<sub>2</sub>Cl<sub>2</sub> (3 x 75 mL). The organic layers were combined, dried with MgSO<sub>4</sub>, and the solvent was removed under reduced pressure. The crude mixture was purified by flash chromatography on silica gel. Eluting with hexane afforded the desired product as a crystalline white solid (7.56 g, 80 %). <sup>1</sup>H NMR (300 MHz, CDCl<sub>3</sub>, ppm) δ 7.34 (s, 2H), 4.77 (s, 4H). <sup>13</sup>C NMR (75 MHz, CDCl<sub>3</sub>) δ 136.73, 134.49, 131.32, 26.43. HRMS (EI<sup>+</sup>): calcd. for C<sub>8</sub>H<sub>6</sub>Cl<sub>2</sub>Br<sub>2</sub>: 331.8191, found: 329.8215.

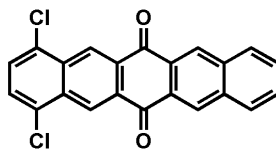

**1,4-dichloropentacene-6,13-dione (S4).** In a 250 mL roundbottom flask, 1,4-anthraquinone (2.00 g, 9.61 mmol), **S3** (3.19 g, 9.61 mmol), potassium iodide (11.16 g, 67.2 mmol), were added to 150 mL of anhydrous DMF. The flask was closed with a rubber septum and then flushed with argon for five minutes. The mixture was stirred at 110 °C for 16 h, cooled to 0 °C and then filtered. The solid was washed with methanol to provide a yellow solid (2.91 g, 80 %) that was analytically pure. <sup>1</sup>H NMR (300 MHz,

CDCl<sub>3</sub>, ppm)  $\delta$ . 9.43 (s, 2H), 9.02 (s, 2H), 8.12 (m, 2H), 7.74 (m, 4H). Too insoluble for carbon and mass.

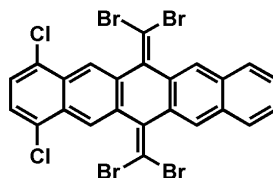

**1,4-dichloro-6,13-bis(dibromomethylene)-6,13-dihydropentacene (S5).** In a 100 mL roundbottom flask, **S4** (1.18 g, 3.13 mmol), CBr<sub>4</sub> (4.15 g, 12.5 mmol), and PPh<sub>3</sub> (6.56 g, 25.0 mmol) were added to 100 mL of toluene. The mixture was heated to 100 °C and stirred for 16 h under an argon atmosphere. The reaction was cooled to room temperature and the solvent was removed under reduced pressure revealing a white solid. The solid was suspended in 5 mL of CH<sub>2</sub>Cl<sub>2</sub> and isolated by vacuum filtration to provide product that was analytically pure (1.42 g, 66 %). <sup>1</sup>H NMR (300 MHz, CDCl<sub>3</sub>, ppm)  $\delta$  8.85 (s, 2H), 8.35 (s, 2H), 7.89 (m, 2H), 7.57 (m, 4H). <sup>13</sup>C NMR (75 MHz, CDCl<sub>3</sub>, ppm)  $\delta$  139.4, 135.7, 133.2, 132.2, 131.6, 130.5, 129.0, 128.5, 127.8, 127.3, 125.0, 92.34. MS did not show molecular ion.

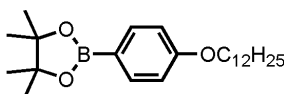

**2-(4-(dodecyloxy)phenyl)-4,4,5,5-tetramethyl-1,3,2-dioxaborolane (S6).** Prepared as previously described.<sup>1</sup>

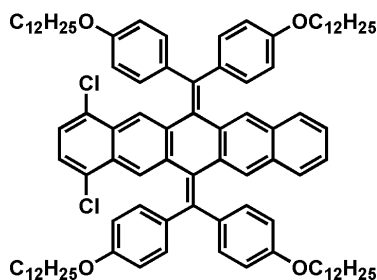

**6,13-bis(bis(4-(dodecyloxy)phenyl)methylene)-1,4-dichloro-6,13-dihydropentacene (S7).** In a 2-necked roundbottom flask equipped with a stirbar and a reflux condensor, 24 mL of toluene and 12 mL of water was degassed by bubbling with argon for 15 minutes. **S5** (500 mg, 0.726 mmol), **S6** (1.69 g, 4.36 mmol), Pd(PPh<sub>3</sub>)<sub>4</sub> (336 mg, 0.290 mmol), and K<sub>2</sub>CO<sub>3</sub> (3.21 g, 23.2 mmol) were added and the reaction was stirred at 110°C for 16 h. The reaction was cooled to room temperature and saturated NH<sub>4</sub>Cl<sub>(aq)</sub> (10 mL) was added. The organic layer was separated and the aqueous layer was extracted with CH<sub>2</sub>Cl<sub>2</sub> (3 x 30 mL). The organic fractions were combined, dried over MgSO<sub>4</sub>, and the solvent was removed under reduced pressure. Purification of the crude material by silica gel chromatography (5:1 hexane:CH<sub>2</sub>Cl<sub>2</sub>) produced pure compound as an off-white solid (832 mg, 81 %). <sup>1</sup>H NMR (300 MHz, CDCl<sub>3</sub>, ppm)  $\delta$  7.95 (s, 2H), 7.58 (s, 2H), 7.43 (m,

2H), 7.33 (m, 8H), 7.23 (m, 2H), 7.19 (s, 2H), 6.79 (m, 8H), 3.89 (m, 8H), 1.72 (m, 8H), 1.26 (m, 72H), 0.88 (m, 12H).  $^{13}\text{C}$  NMR (75 MHz,  $\text{CDCl}_3$ , ppm).  $\delta$  158.4, 158.3, 141.9, 138.8, 136.5, 135.0, 134.9, 132.0, 131.2, 131.2, 131.0, 129.7, 128.2, 127.5, 125.9, 125.6, 124.5, 114.8, 114.7, 68.42, 68.33, 32.33, 30.05, 29.82, 29.77, 29.70, 26.44, 23.11, 14.54. MS (FAB<sup>+</sup>): calcd. for  $\text{C}_{96}\text{H}_{126}\text{Cl}_2\text{O}_4$ : 1414.93, found: 1415.87. Anal. calcd. for  $\text{C}_{96}\text{H}_{126}\text{Cl}_2\text{O}_4$ : C, 81.49; H, 8.98, Found: C, 81.53; H, 8.97.

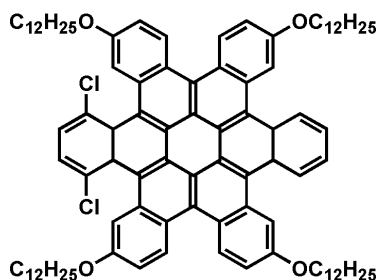

**1,4-dichloro-6,11,18,23-tetrakis(dodecyloxy)trinaphtho[1,2,3,4-fgh:1',2',3',4'-pqr:1'',2'',3'',4''-za1b1]trinaphthylene (2-Chloro-HBC, S8).** The photocyclization setup has been previously described.<sup>2</sup> A mixture of compound S7 (240 mg, 0.17 mmol), iodine (259 mg, 1.02 mmol) and propylene oxide (20 mL) in 300 mL of anhydrous benzene were irradiated with UV light (Hanovia 450 W high-pressure quartz Hg-vapor lamp) in an immersion well. Argon was bubbled through the reaction vessel during the photocyclization. To maintain a constant temperature, the whole apparatus was submerged in a large bath of circulating water. After 3 h of irradiation, the solvent was removed under reduced pressure. The resulting material was half-closed HBC. The material was quickly purified with a silica plug and a 2:1 hexane: $\text{CH}_2\text{Cl}_2$  wash. The fractions were concentrated and the resulting material was taken up into 300 mL  $\text{CH}_2\text{Cl}_2$  and bubbled with argon while  $\text{FeCl}_3$  (182 mg, 1.1 mmol) in 0.5 mL  $\text{CH}_3\text{NO}_2$  was added. The resulting mixture was stirred for 2 h and then quenched by the addition of 300 mL methanol. The  $\text{CH}_2\text{Cl}_2$  was removed by rotary evaporation and led to a yellow precipitate. This solid was filtered with a Millipore vacuum filtration apparatus to give 184 mg of a yellow solid (77 %).  $^1\text{H}$  NMR (300 MHz,  $\text{CDCl}_3$ , ppm)  $\delta$  9.40 (m, 2H), 9.12 (d,  $J$  = 8.7 Hz, 2H), 8.93 (d,  $J$  = 9.0 Hz, 2H), 8.71 (s, 2H), 7.85 (s, 2H), 7.80 (m, 2H), 7.71 (s, 2H), 7.48 (d,  $J$  = 8.1 Hz, 2H), 7.35 (d,  $J$  = 8.7 Hz, 2H), 4.23 (bm, 8H), 1.93 (bm, 8H), 1.27 (bs, 44H), 0.874 (bs, 12H).  $^{13}\text{C}$  NMR (75 MHz,  $\text{CDCl}_3$ , ppm).  $\delta$  158.1, 156.7, 132.2, 132.0, 131.8, 131.5, 130.6, 130.3, 129.6, 128.7, 128.5, 126.5, 125.6, 125.4, 125.1, 123.4, 122.0, 121.7, 118.2, 117.4, 117.3, 113.0, 111.9, 68.9, 68.7, 32.3, 30.1, 29.9, 29.8, 26.6, 23.1, 14.5. MS (FAB<sup>+</sup>): calcd. for  $\text{C}_{96}\text{H}_{118}\text{Cl}_2\text{O}_4$ : 1406.87, found: 1407.16. Anal. calcd. for  $\text{C}_{96}\text{H}_{118}\text{Cl}_2\text{O}_4$ : C, 81.96; H, 8.45, Found: C, 81.99; H, 8.44.

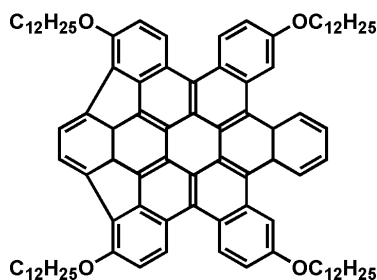

**3,8,15,20-tetrakis(dodecyloxy)-9c,13a,20c,20d-tetrahydrobenzo[1,8]-as-indaceno[2,3,4,5,6,7-defghij]dinaphtho[1,2,3,4-pqr:1',2',3',4'-za1b1]trinaphthylene (2-closed HBC, S9).** In an oven dried 10 mL microwave vial were added **S8** (10.0 mg, 7.10  $\mu$ mol), Pd(PCy<sub>3</sub>)<sub>2</sub>Cl<sub>2</sub> (10.5 mg, 14.2  $\mu$ mol), DBU (100  $\mu$ L, 1.34 mmol), and DMA (2 mL). The vial was capped and the mixture was degassed by bubbling with argon for 15 minutes. In a microwave reactor the sample was heated at 150 °C for 3 h. After cooling, the crude reaction mixture was added to 5 mL of H<sub>2</sub>O and the mixture was extracted with CH<sub>2</sub>Cl<sub>2</sub> (3 x 10 mL). The organic layers were combined, dried over MgSO<sub>4</sub>, and the solvent was removed under reduced pressure. Purification by preparative TLC on neutral alumina eluting with CS<sub>2</sub> yielded 7.8 mg of the product as a reddish-orange solid (82 %). <sup>1</sup>H NMR (300 MHz, CDCl<sub>3</sub>, ppm)  $\delta$  9.26 (m, 2H), 8.83 (d, *J* = 9.0 Hz, 2H), 8.63 (s, 2H), 8.02 (d, *J* = 9.0 Hz, 2H), 7.66 (m, 2H), 7.49 (d, *J* = 9.0 Hz, 2H), 7.28 (s, 2H), 6.75 (d, *J* = 9.0 Hz, 2H), 4.45-4.15 (m, 6H), 3.97 (m, 2H), 2.02 (m, 8H), 1.80 (m, 16H), 1.35 (m, 56H), 0.88 (m, 12H). <sup>13</sup>C NMR (75 MHz, CDCl<sub>3</sub>, ppm)  $\delta$  157.2, 155.0, 140.5, 140.0, 138.7, 137.6, 131.6, 130.8, 130.0, 128.4, 127.9, 126.4, 124.2, 121.9, 121.5, 117.0, 116.7, 113.13, 69.46, 68.88, 32.26, 30.09, 29.91, 29.80, 28.13, 27.05, 26.67, 26.40, 23.11, 14.29. MS (FAB+): calcd. for C<sub>96</sub>H<sub>116</sub>O<sub>4</sub>: 1333.95, found: 1334.36. Anal. calcd. for C<sub>96</sub>H<sub>116</sub>O<sub>4</sub>: C, 86.44; H, 8.77, Found: C, 86.51; H, 8.84.

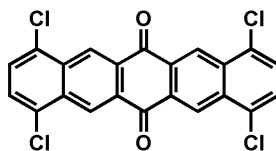

**1,4,8,11-tetrachloropentacenequinone (S10).** In a 1000 mL roundbottom flask were added **S3** (12.0 g, 36.1 mmol), benzoquinone (1.95 g, 18.0 mmol), potassium iodide (90.0 g, 54.2 mmol) and 500 mL of anhydrous DMF. The flask was closed with a rubber septum and then flushed with argon for five minutes. The mixture was stirred at 110 °C for 16 h then cooled to 0 °C and filtered. The solid was washed with methanol to provide a yellow solid (7.07 g, 88 %). This material proved to be too insoluble for characterization so was carried on without further manipulation.



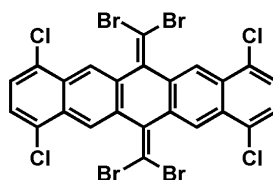

**1,4,8,11-tetrachloro-6,13-bis(dibromomethylene)-6,13-dihydropentacene (S11).** In a 100 mL roundbottom flask, **S10** (250 mg, 0.560 mmol),  $\text{CBr}_4$  (929 mg, 2.80 mmol), and  $\text{PPh}_3$  (1.47 g, 5.60 mmol) were added to 30 mL of toluene. The mixture was heated to 100 °C and stirred for 16 h under an argon atmosphere. The reaction was cooled to room temperature and the solvent was removed under reduced pressure revealing a white solid. The solid was suspended in 5 mL of  $\text{CH}_2\text{Cl}_2$  and isolated by vacuum filtration to provide product that was pure enough for further use (203 mg, 48%). Purification with silica gel chromatography (19:1 hexane: $\text{CH}_2\text{Cl}_2$ ) produced analytically pure product as a white crystalline solid.  $^1\text{H}$  NMR (300 MHz,  $\text{CDCl}_3$ , ppm)  $\delta$  8.73 (s, 4H), 7.44 (s, 4H).  $^{13}\text{C}$  NMR (75 MHz,  $\text{CDCl}_3$ , ppm) 138.7, 135.1, 131.7, 130.6, 127.5, 125.2, 93.9. MS did not show molecular ion. Carried forward.

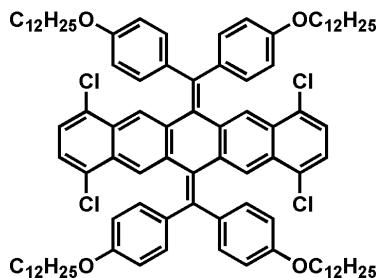

**6,13-bis(bis(4-(dodecyloxy)phenyl)methylene)-1,4,8,11-tetrachloro-6,13-dihydropentacene (S12).** In a 2-necked roundbottom flask equipped with a stirbar and a reflux condensor, 12 mL of toluene and 6 mL of water was degassed by bubbling with argon for 15 minutes. **S11** (250 mg, 0.330 mmol), **S6** (769 mg, 1.98 mmol),  $\text{Pd}(\text{PPh}_3)_4$  (152 mg, 0.132 mmol), and  $\text{K}_2\text{CO}_3$  (1.46 g, 10.56 mmol) were added and the reaction was stirred at 110°C for 16 h. The reaction was cooled to room temperature and saturated  $\text{NH}_4\text{Cl}_{(\text{aq})}$  (10 mL) was added. The organic layer was separated and the aqueous layer was extracted with  $\text{CH}_2\text{Cl}_2$  (3 x 15 mL). The organic fractions were combined, dried over  $\text{MgSO}_4$ , and the solvent was removed under reduced pressure. Purification of the crude material by silica gel chromatography (5:1 hexane: $\text{CH}_2\text{Cl}_2$ ) produced pure compound as an off white solid (323 mg, 66%).  $^1\text{H}$  NMR (300 MHz,  $\text{CDCl}_3$ , ppm)  $\delta$  7.99 (s, 4H), 7.33 (d,  $J$  = 8.7 Hz, 8H), 7.21 (s, 4H), 6.81 (d,  $J$  = 8.7 Hz, 8H), 3.91 (t,  $J$  = 6.6 Hz, 8H), 1.74 (m, 8H), 1.27 (m, 72H), 0.88 (m, 12H).  $^{13}\text{C}$  NMR (75 MHz,  $\text{CDCl}_3$ , ppm)  $\delta$  158.13, 143.01, 137.81, 134.22, 133.90, 130.64, 129.42, 125.28, 124.38, 68.013, 31.879, 29.590, 29.355, 29.309, 29.210, 25.977, 22.645, 14.070, MS (FAB+): calcd. For  $\text{C}_{96}\text{H}_{124}\text{Cl}_4\text{O}_4$ : 1483.82, found: 1483.10. Anal. calcd. for  $\text{C}_{96}\text{H}_{124}\text{Cl}_4\text{O}_4$ : C, 77.71; H, 8.42, Found: C, 77.66; H, 8.48.

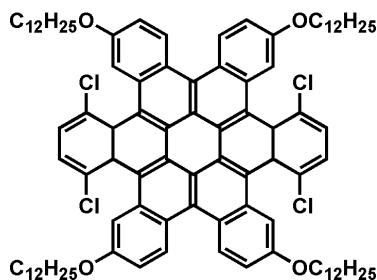

**1,4,13,16-tetrachloro-6,11,18,23-tetrakis(dodecyloxy)trinaphtho[1,2,3,4-fgh:1',2',3',4'-pqr:1'',2'',3'',4''-za1b1]trinaphthylene (4-Chloro-HBC, S13).** A mixture of compound **S12** (229 mg, 0.15 mmol), iodine (662 mg, 2.5 mmol) and propylene oxide (20 mL) in 300 mL of anhydrous benzene were irradiated with UV light (Hanovia 450 W high-pressure quartz Hg-vapor lamp) in an immersion well. Argon was bubbled through the reaction vessel during the photocyclization. To maintain a constant temperature, the whole apparatus was submerged in a large bath of circulating water. After 3 h of irradiation, the solvent was removed under reduced pressure. The resulting material was half-closed HBC. The material was quickly purified with a silica plug and a 2:1 hexane:CH<sub>2</sub>Cl<sub>2</sub> as an eluent. The fractions were concentrated and the resulting material was taken up into 250 mL CH<sub>2</sub>Cl<sub>2</sub> and bubbled with argon while FeCl<sub>3</sub> (200 mg, 1.2 mmol) in 0.5 mL CH<sub>3</sub>NO<sub>2</sub> was added. The resulting mixture was stirred for 2 h and then quenched by the addition of 300 mL methanol. The CH<sub>2</sub>Cl<sub>2</sub> was removed by rotary evaporation and led to a yellow precipitate. This solid was filtered with a Millipore vacuum filtration apparatus to give 169 mg of a yellow solid (74 %). <sup>1</sup>H NMR (300 MHz, CDCl<sub>3</sub>, ppm) δ 9.02 (d, *J* = 9.0 Hz, 4H), 7.90 (s, 4H), 7.78 (s, 4H), 7.46 (d, *J* = 9.0 Hz, 4H), 4.34 (m, 4H), 4.17 (m, 4H), 1.94 (m, 8H), 1.29 (m, 72H), 0.88 (m, 12H). <sup>13</sup>C NMR (75 MHz, CDCl<sub>3</sub>, ppm) δ 156.8, 132.1, 130.8, 130.5, 130.1, 129.5, 124.4, 123.6, 122.4, 117.8, 113.9, 68.7, 32.31, 30.03, 29.86, 29.75, 23.08, 14.50. MS (FAB+): calcd. for C<sub>96</sub>H<sub>116</sub>Cl<sub>4</sub>O<sub>4</sub>: 1475.76, found: 1475.24. Anal. calcd. for C<sub>96</sub>H<sub>116</sub>Cl<sub>4</sub>O<sub>4</sub>: C, 78.13; H, 7.92, Found: C, 78.19; H, 7.86.

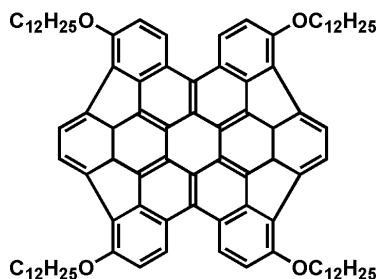

**4-closed (S14).** In an oven dried 10 mL microwave vial were added **S13** (10.0 mg, 6.78 μmol), Pd(PCy<sub>3</sub>)<sub>2</sub>Cl<sub>2</sub> (20.0 mg, 27.1 μmol), DBU (200 μL, 1.34 mmol), and DMA (2 mL). The vial was capped and the mixture was degassed by bubbling with argon for 15 minutes. In a microwave reactor the sample was heated at 150 °C for 3 h. Three more reactions were performed (4 X 10 mg total) and the solutions were combined. After cooling, the crude reaction mixture was added to 5 mL of H<sub>2</sub>O and the mixture was extracted with CH<sub>2</sub>Cl<sub>2</sub> (3 x 10 mL). The organic layers were combined, dried over MgSO<sub>4</sub>, and the solvent was removed under reduced pressure. The above procedure was repeated 4 times and the crude material from each reaction was combined. Multiple

purifications by preparative TLC on neutral alumina eluting with CS<sub>2</sub> eventually yielded the product as a reddish-orange solid (7 mg, 16%). <sup>1</sup>H NMR (300 MHz, CD<sub>2</sub>Cl<sub>2</sub>, ppm) δ 8.34 (d, *J* = 9.3 Hz, 4H), 7.32 (s, 4H), 6.89 (d, *J* = 9.0 Hz, 4H), 4.36 (m, 4H), 4.11 (m, 4H), 1.93 (m, 8H), 1.60 (m, 8H), 1.38 (m, 64H), 0.91 (m, 12H). <sup>13</sup>C NMR (75 MHz, CD<sub>2</sub>Cl<sub>2</sub>, ppm) δ 154.2, 139.6, 139.5, 138.5, 137.6, 131.0, 130.8, 128.1, 126.7, 126.2, 125.2, 123.1, 116.6, 69.37, 32.33, 30.15, 30.04, 29.79, 26.58, 23.08, 14.26, . HRMS (FAB+): calcd. for C<sub>96</sub>H<sub>113</sub>O<sub>4</sub>: 1329.8639, found: 1329.8616.

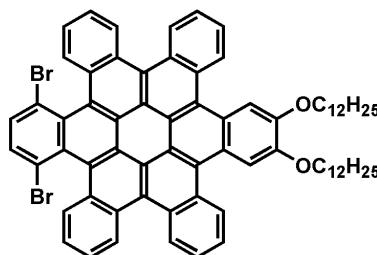

**1,4-dibromo-14,15-bis(dodecyloxy)trinaphtho[1,2,3,4-fgh:1',2',3',4'-pqr:1'',2'',3'',4''-za1b1]trinaphthylene (HBC, S15).** Prepared as described previously.<sup>3</sup>

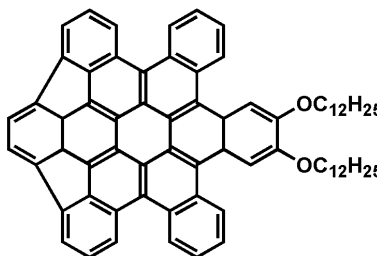

**11,12-bis(dodecyloxy)-9c,13a,20c,20d-tetrahydrobenzo[1,8]-as-indaceno[2,3,4,5,6,7-defghij]dinaphtho[1,2,3,4-pqr:1',2',3',4'-za1b1]trinaphthylene (2-closed-2chain-HBC, S16).** In the glove box, **S15** (21.5 mg, 0.021 mmol), Pd(PCy<sub>3</sub>)<sub>2</sub>Cl<sub>2</sub> (14.0 mg, 0.019 mmol), DBU (0.150 mL, 1.00 mmol), and DMA (3 mL) were added to a 10 mL microwave vial and the vial was capped. The vessel was removed from the glove box and placed into a microwave reactor where it was heated at 140 °C for 3 h. After cooling, the solvent was removed under reduced pressure and the crude material was chromatographed on silica gel (4:1 hexane:CH<sub>2</sub>Cl<sub>2</sub>). The first product off the column was completely debrominated **S17** as a yellow solid (4.4 mg, 24%) followed by the desired product **S16** as a red solid (1.8 mg, 10%) and finally **S18** as a yellow solid (10.5 mg, 57%). Often multiple columns were required to afford pure product. <sup>1</sup>H NMR (300MHz, C<sub>2</sub>D<sub>2</sub>Cl<sub>4</sub>, ppm): δ 8.69 (d, *J* = 7.5 Hz, 2H), 8.62 (d, *J* = 7.8 Hz, 2H), 7.98 (s, 2H), 7.86 (d, *J* = 8.4 Hz, 2H), 7.40-7.20 (m, 4H), 6.97 (d, *J* = 6.9 Hz, 2H), 6.89 (s, 2H), 6.81 (t, *J* = 7.8 Hz, 2H), 3.65 (m, 2H), 3.50 (m, 2H), 1.30 (m, 4H), 1.2-0.1 (m, 42H). <sup>13</sup>C NMR (75 MHz, C<sub>2</sub>D<sub>2</sub>Cl<sub>4</sub>, ppm): δ 148.9, 142.1, 136.7, 131.4, 130.1, 129.3, 129.0, 127.8, 127.7, 127.4, 127.1, 127.0, 126.1, 125.5, 125.4, 124.9, 122.3, 121.8, 120.2, 111.5, , 31.79, 29.57, 29.39, 29.25, 36.03, 22.60, 14.11. HRMS (FAB+): calcd. for C<sub>72</sub>H<sub>68</sub>O<sub>2</sub>: 964.5219, found 964.5205.

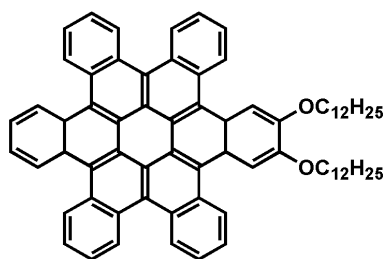

**2,3-bis(dodecyloxy)-4a,12c,16a,24c-tetrahydrotrinaphtho[1,2,3,4-fgh:1',2',3',4'-pqr:1'',2'',3'',4''-za1b1]trinaphthylene (2-chain-HBC, S17).** Isolated from the reaction to form **S16**.  $^1\text{H}$  NMR (300 MHz,  $\text{CDCl}_3$ , ppm)  $\delta$  9.29 (m, 10H), 8.73 (s, 2H), 7.84 (m, 10H), 4.42 (m, 4H), 4.28 (m, 4H), 2.02 (m, 4H), 1.28 (m, 32H), 0.88 (m, 6H).  $^{13}\text{C}$  NMR (75 MHz,  $\text{CDCl}_3$ , ppm)  $\delta$  149.3, 130.5, 130.3, 129.6, 129.4, 129.3, 128.5, 126.7, 126.5, 126.3, 125.8, 120.9, 111.81, 69.74, 32.33, 30.09, 29.95, 29.74, 26.58, 23.09, 14.51. HRMS (FAB $^+$ ): calcd. for  $\text{C}_{72}\text{H}_{72}\text{O}_2$ : 968.5532, found: 968.5507.

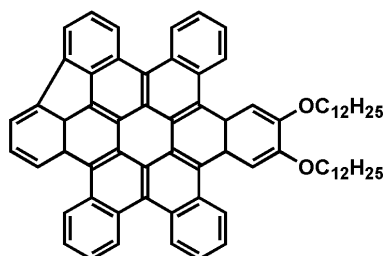

**16,17-bis(dodecyloxy)-3c,6a,14c,18a-tetrahydroacenaphtho[1,2,3,4,5-defgh]dinaphtho[1,2,3,4-pqr:1',2',3',4'-za1b1]trinaphthylene (1-closed-2-chain-HBC, S18).** Isolated from the reaction to form **S16**.  $^1\text{H}$  NMR (300MHz,  $\text{CDCl}_3$ , ppm):  $\delta$  9.26 (d,  $J$  = 7.5 Hz, 2H), 9.17 (d,  $J$  = 8.4 Hz, 1H), 9.02 (m, 2H), 8.94 (d,  $J$  = 7.8 Hz, 1H), 8.66 (s, 1H), 8.53 (s, 1H), 8.39 (d,  $J$  = 8.4 Hz, 1H), 8.29 (d,  $J$  = 8.4 Hz), 7.87-7.62 (m, 6H), 7.45-7.26 (m, 4H), 4.36 (m, 4H), 2.07 (quint,  $J$  = 6.9 Hz, 4H), 1.80-1.20 (m, 36H), 0.88 (m, 6H).  $^{13}\text{C}$  NMR (75MHz,  $\text{CDCl}_3$ , ppm):  $\delta$  149.0, 138.2, 132.6, 132.4, 132.0, 131.8, 129.9, 129.5, 129.2, 128.8, 128.4, 127.5, 126.5, 126.5, 126.1, 125.4, 125.2, 125.0, 123.2, 122.2, 117.7, 112.4, 29.8, 32.4, 30.1, 30.0, 29.8, 26.7, 23.1, 14.5. HRMS (FAB $^+$ ) calcd. for  $\text{C}_{72}\text{H}_{70}\text{O}_2$ : 966.5376, found 966.5347.

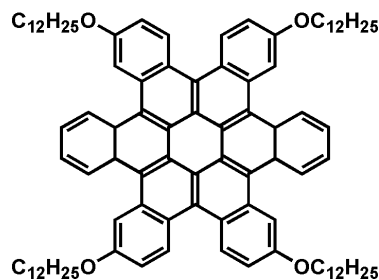

**6,11,18,23-tetrakis(dodecyloxy)-4a,12c,16a,24c-tetrahydrotrinaphtho[1,2,3,4-fgh:1',2',3',4'-pqr:1'',2'',3'',4''-za1b1]trinaphthylene (S19).** Prepared as previously described.<sup>4</sup>

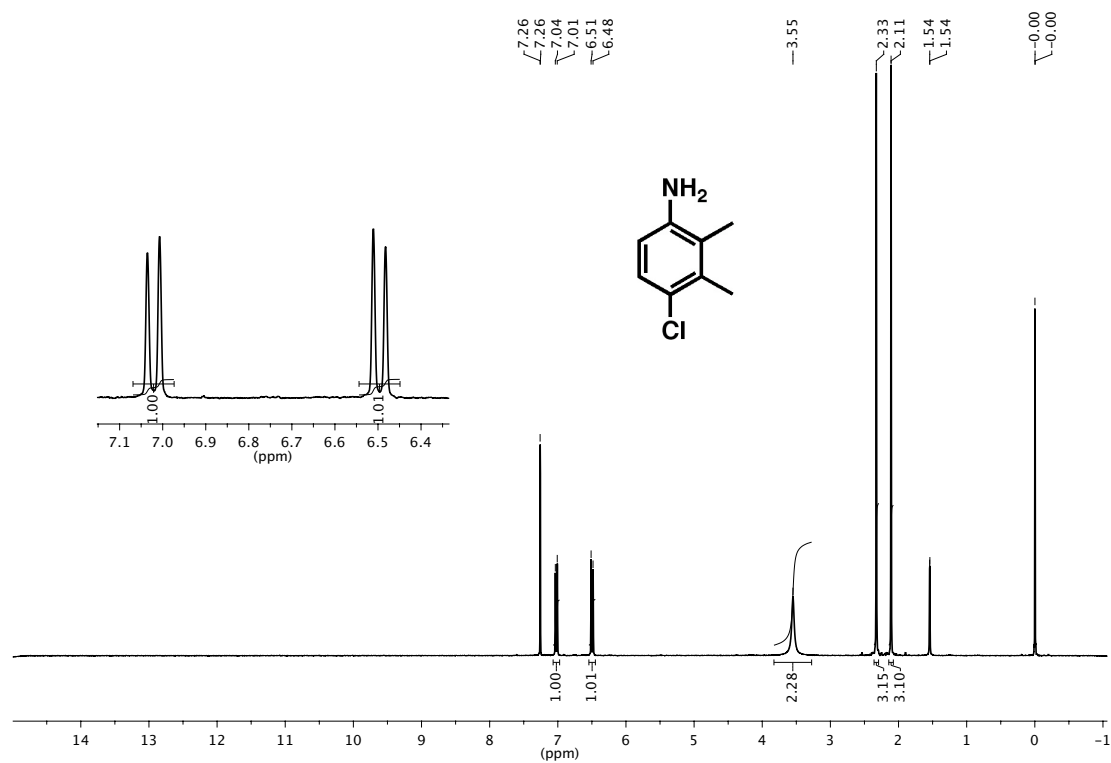

<sup>1</sup>H NMR (CDCl<sub>3</sub>) of S1.

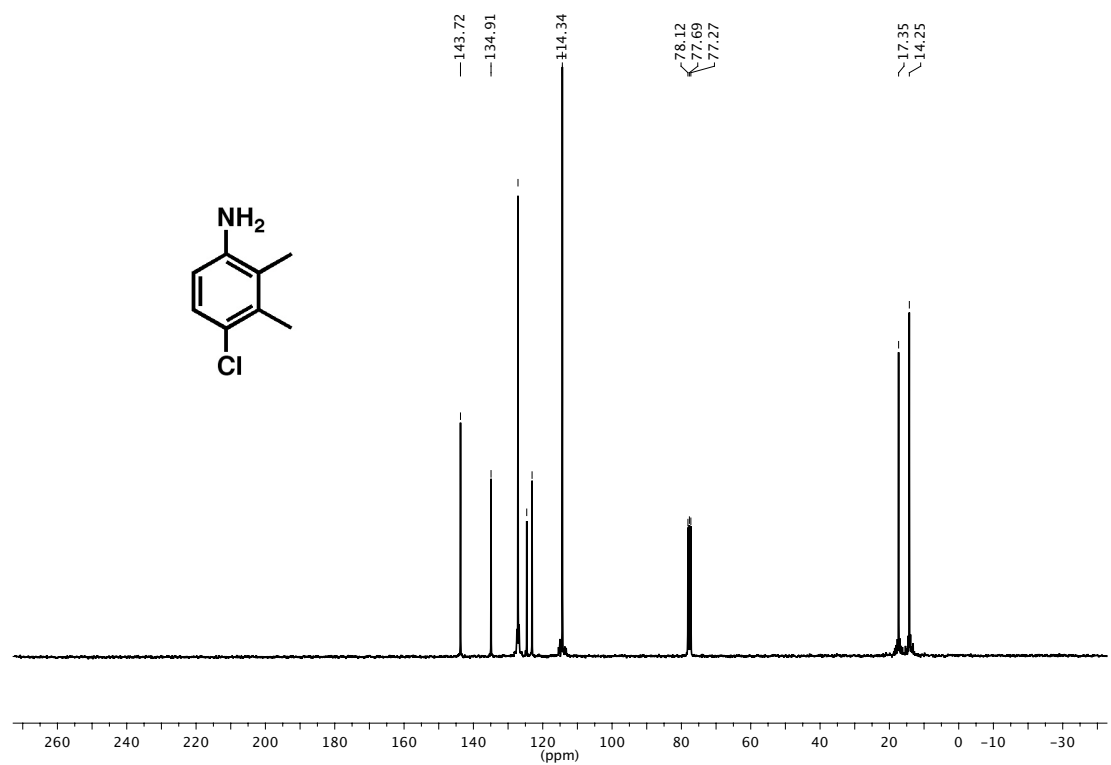

<sup>13</sup>C NMR (CDCl<sub>3</sub>) of S1.

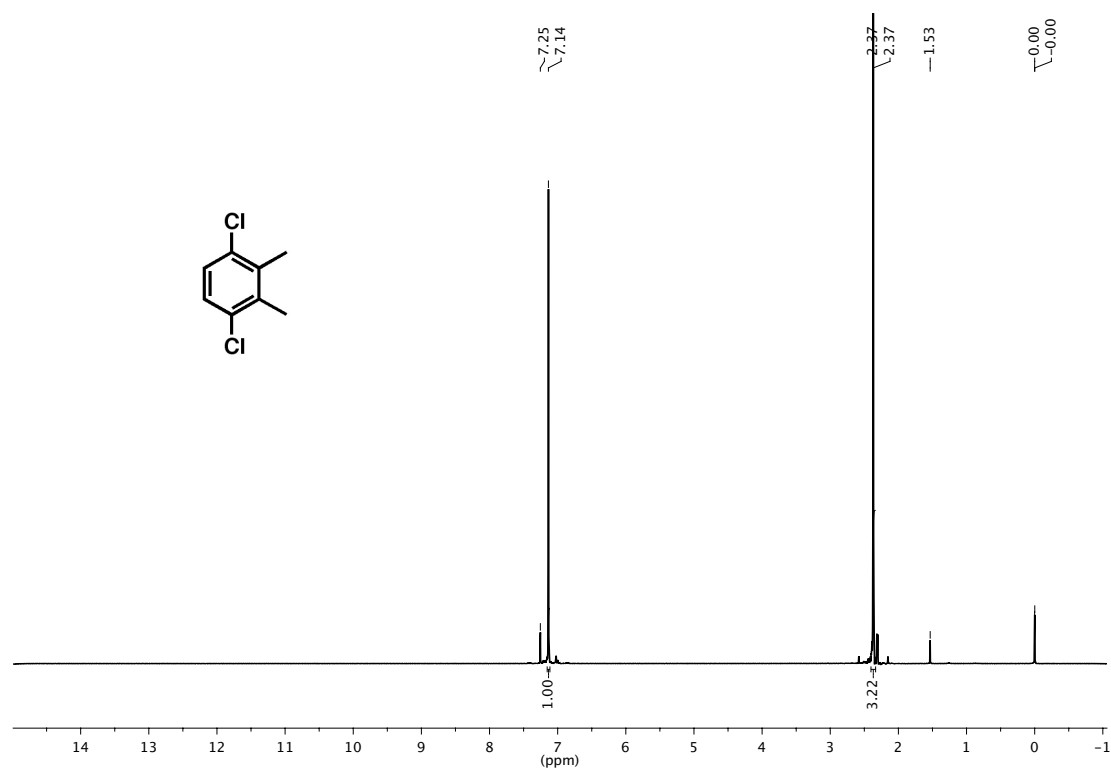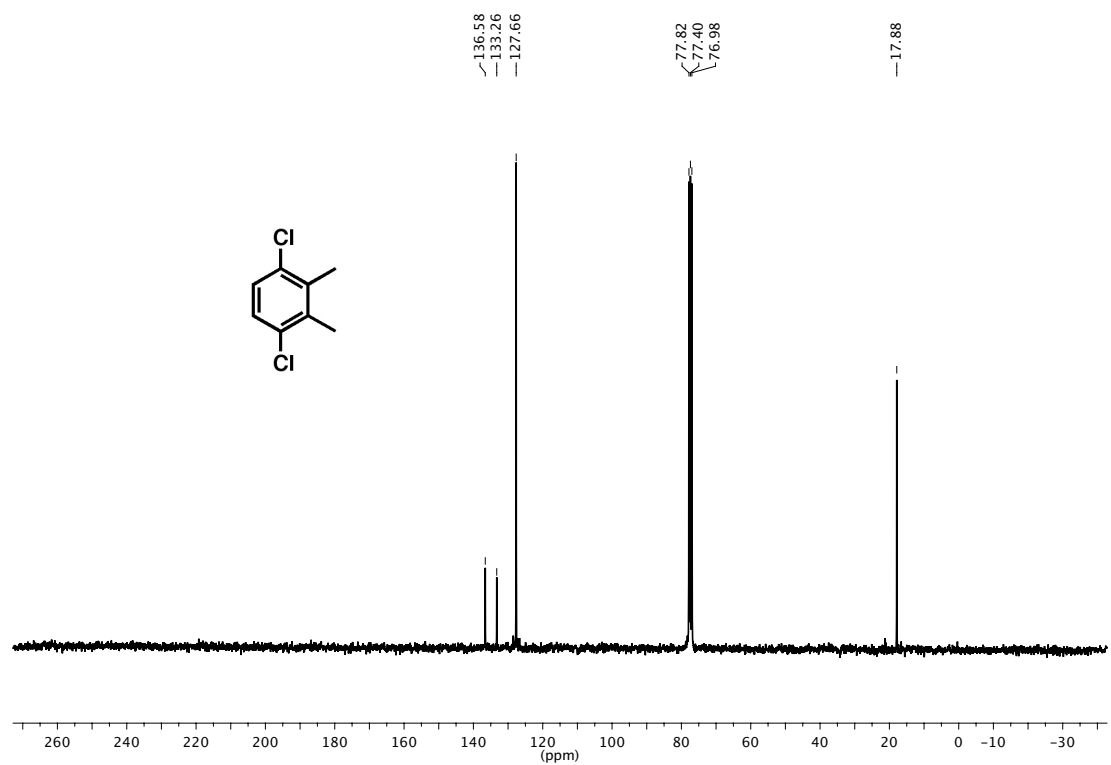

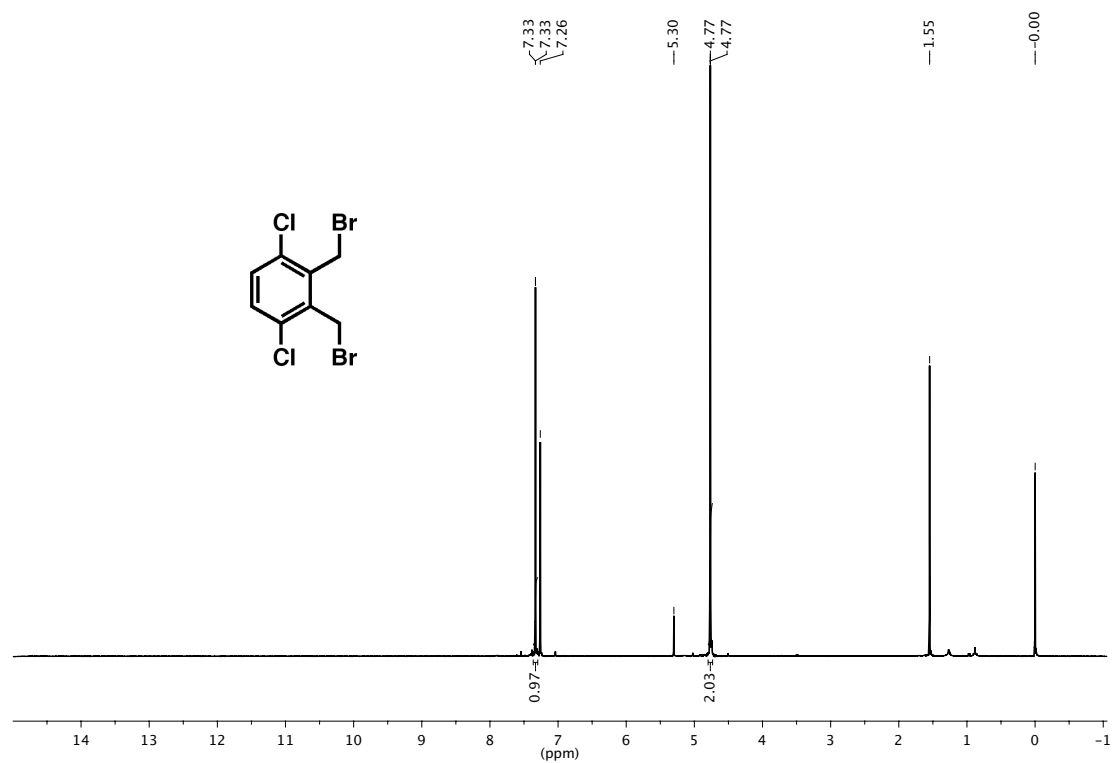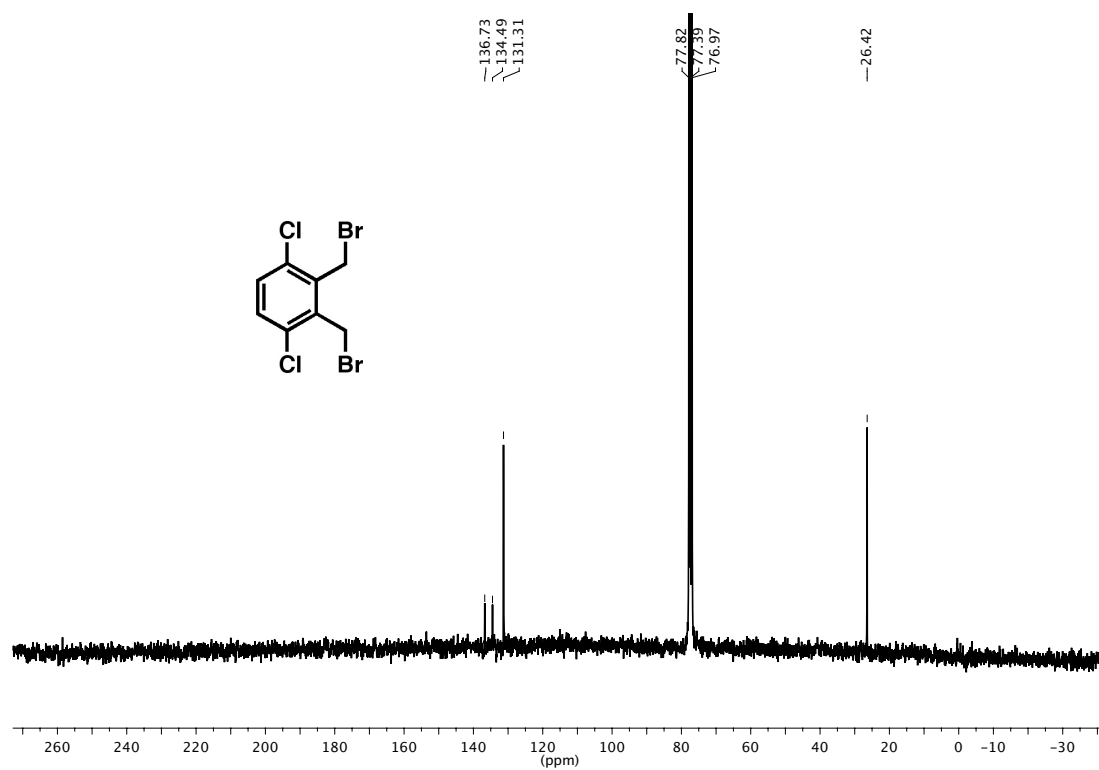

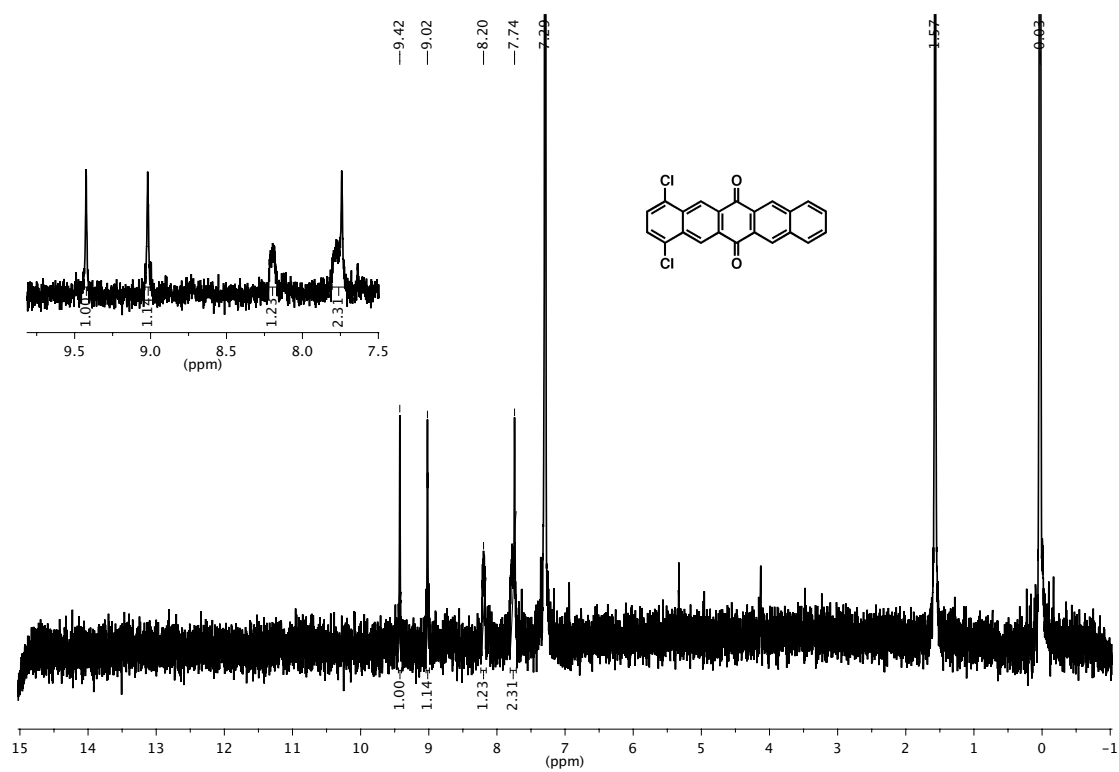

<sup>1</sup>H NMR (CDCl<sub>3</sub>) of S4.



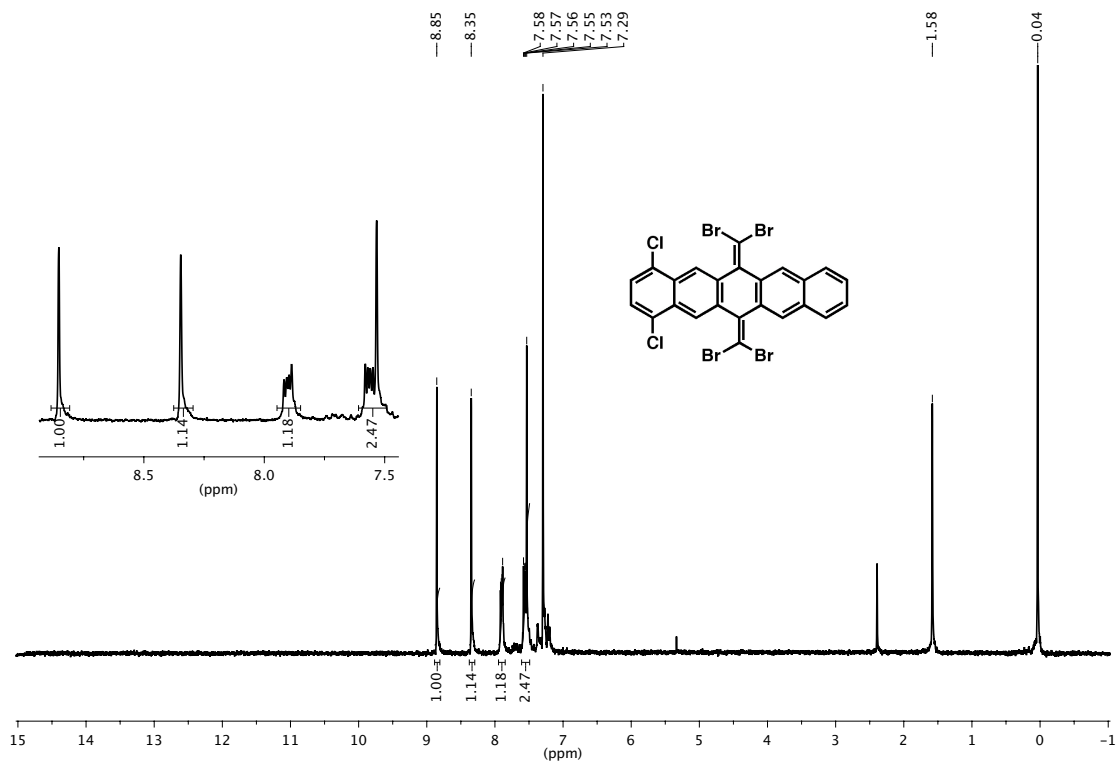

<sup>1</sup>H NMR (CDCl<sub>3</sub>) of S5.

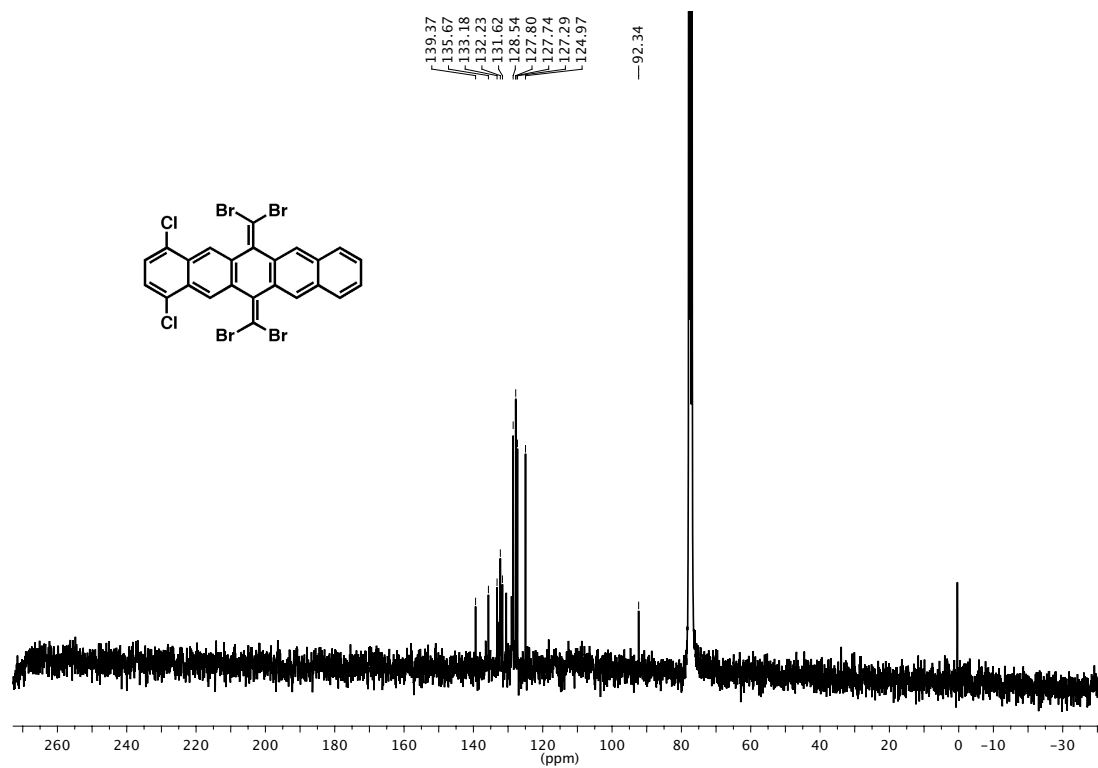

<sup>13</sup>C NMR (CDCl<sub>3</sub>) of S5.

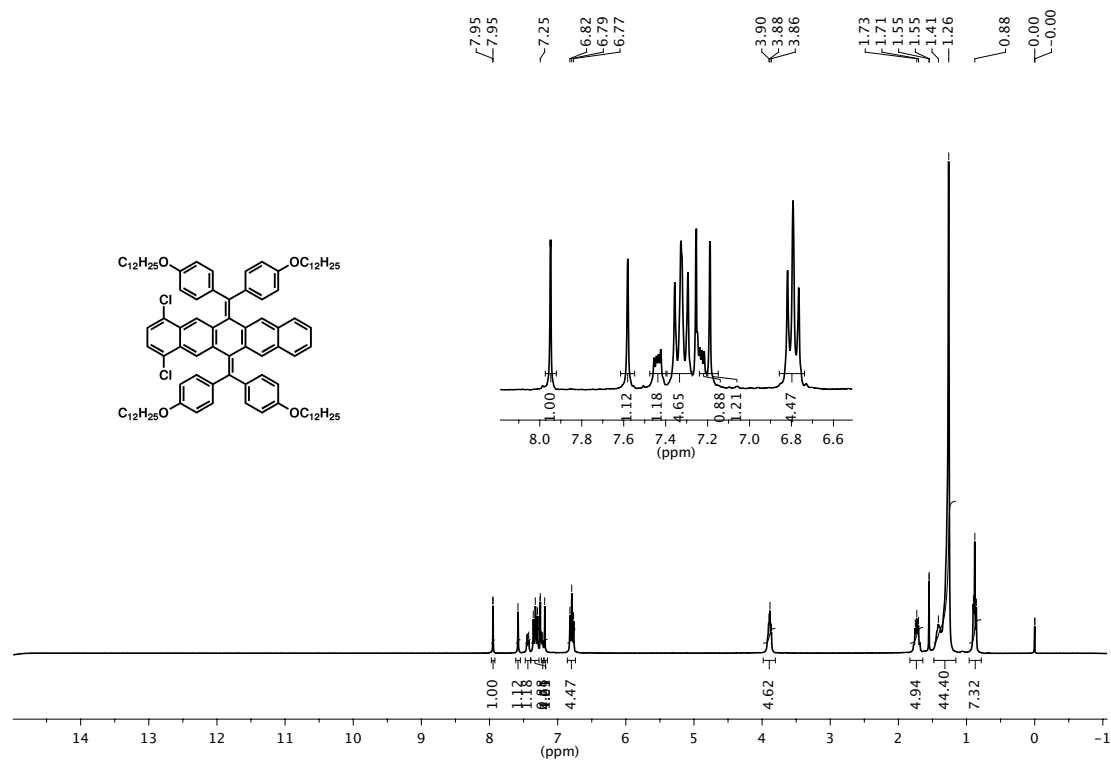

<sup>1</sup>H NMR (CDCl<sub>3</sub>) of S7.

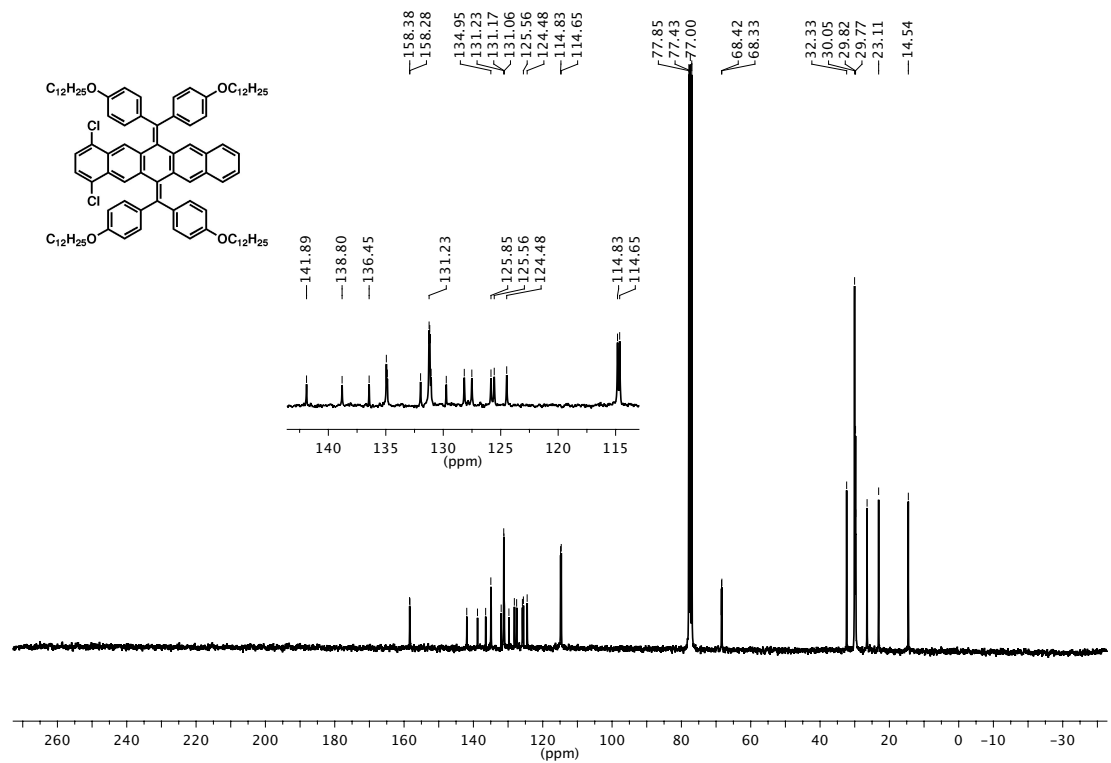

<sup>13</sup>C NMR (CDCl<sub>3</sub>) of S7.

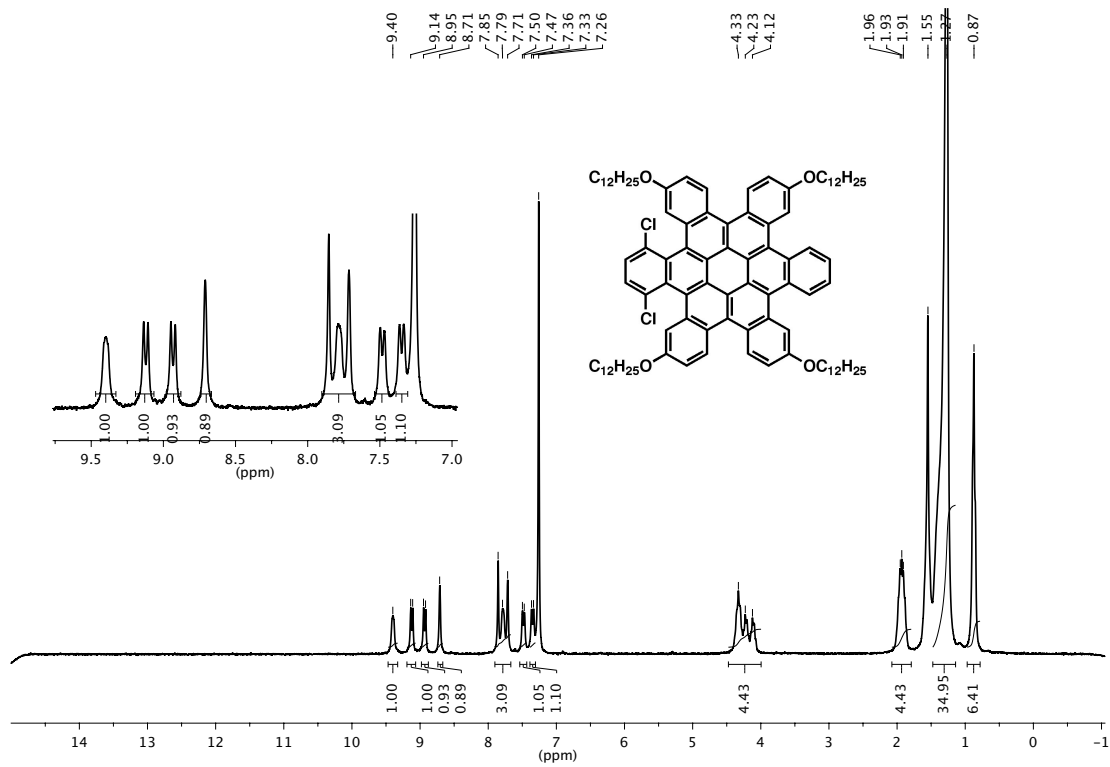<sup>1</sup>H NMR (CDCl<sub>3</sub>) of S8.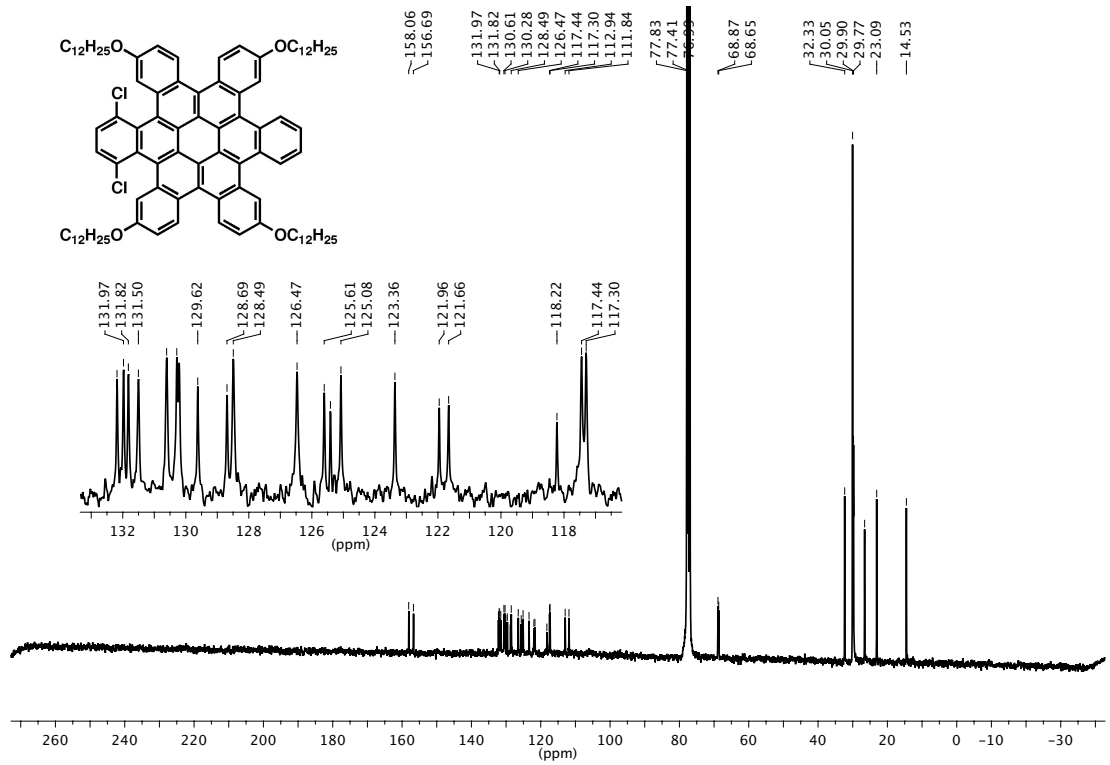

<sup>13</sup>C NMR (CDCl<sub>3</sub>) of S8.

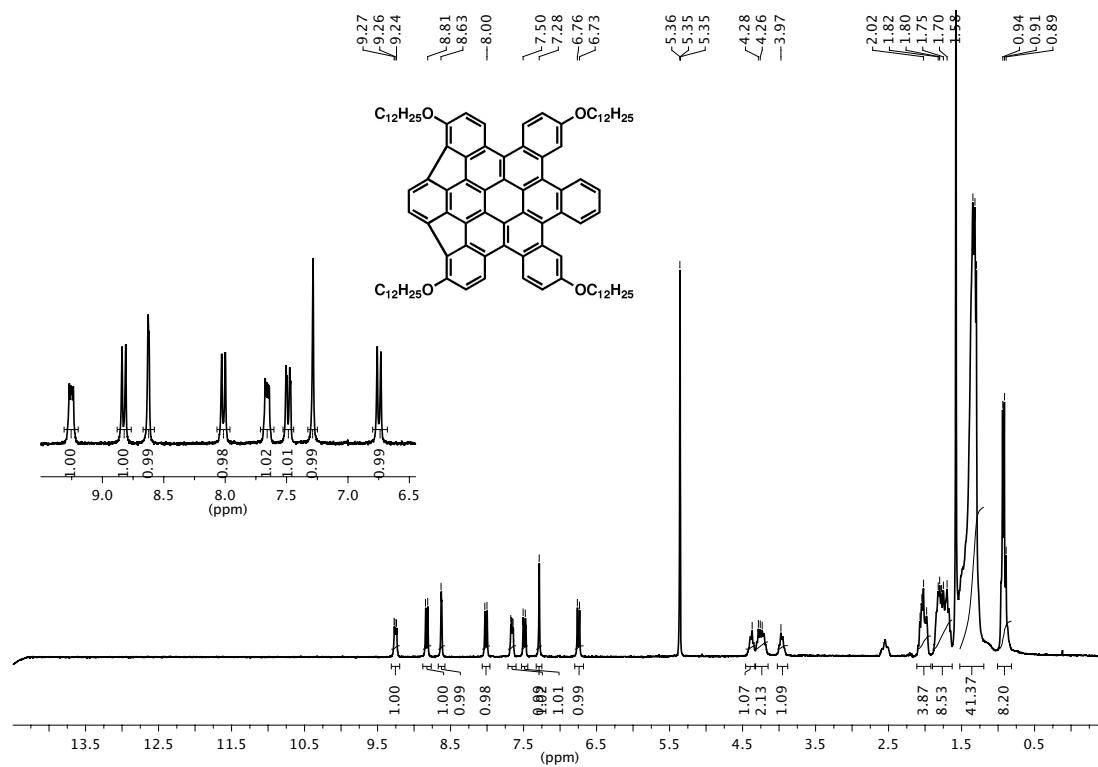

<sup>1</sup>H NMR (CDCl<sub>3</sub>) of S9.

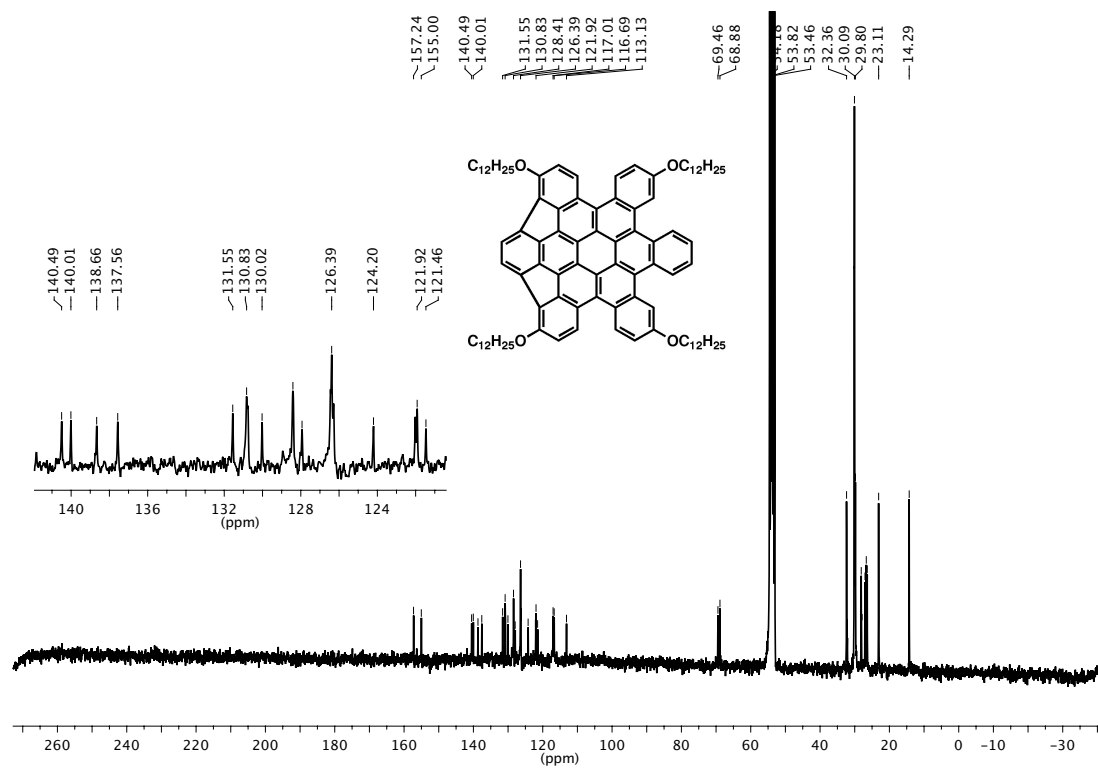

<sup>13</sup>C NMR (CDCl<sub>3</sub>) of S9.

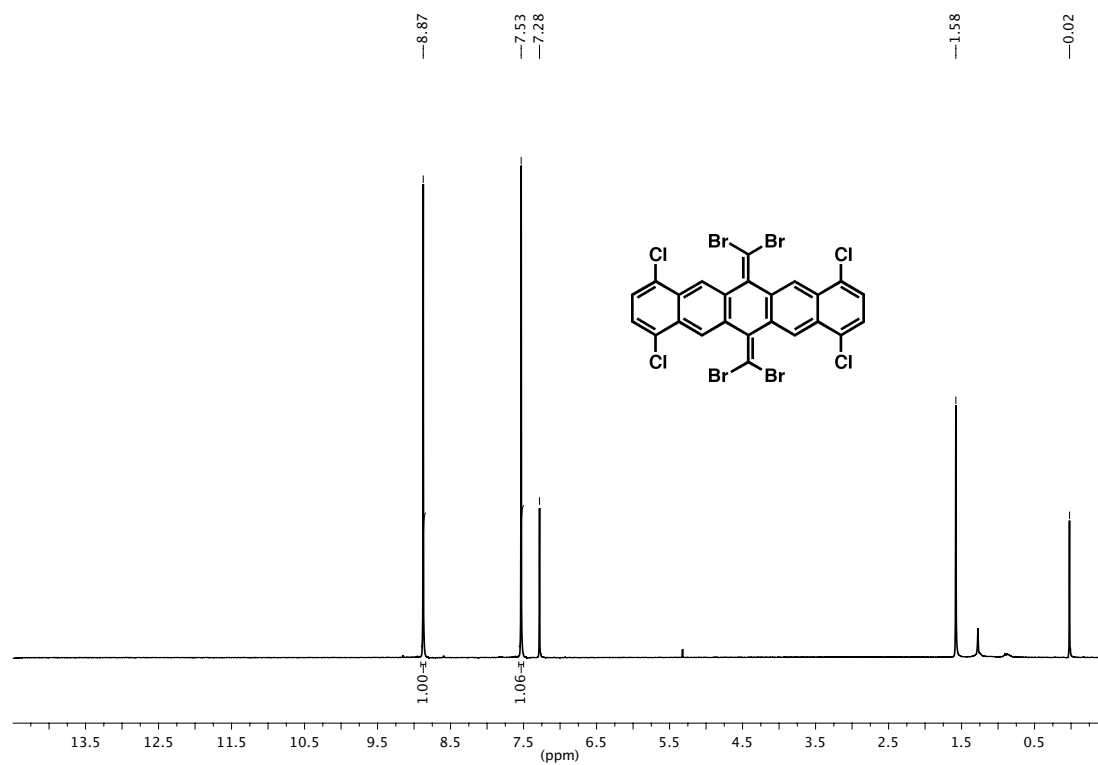

<sup>1</sup>H NMR (CDCl<sub>3</sub>) of S11.

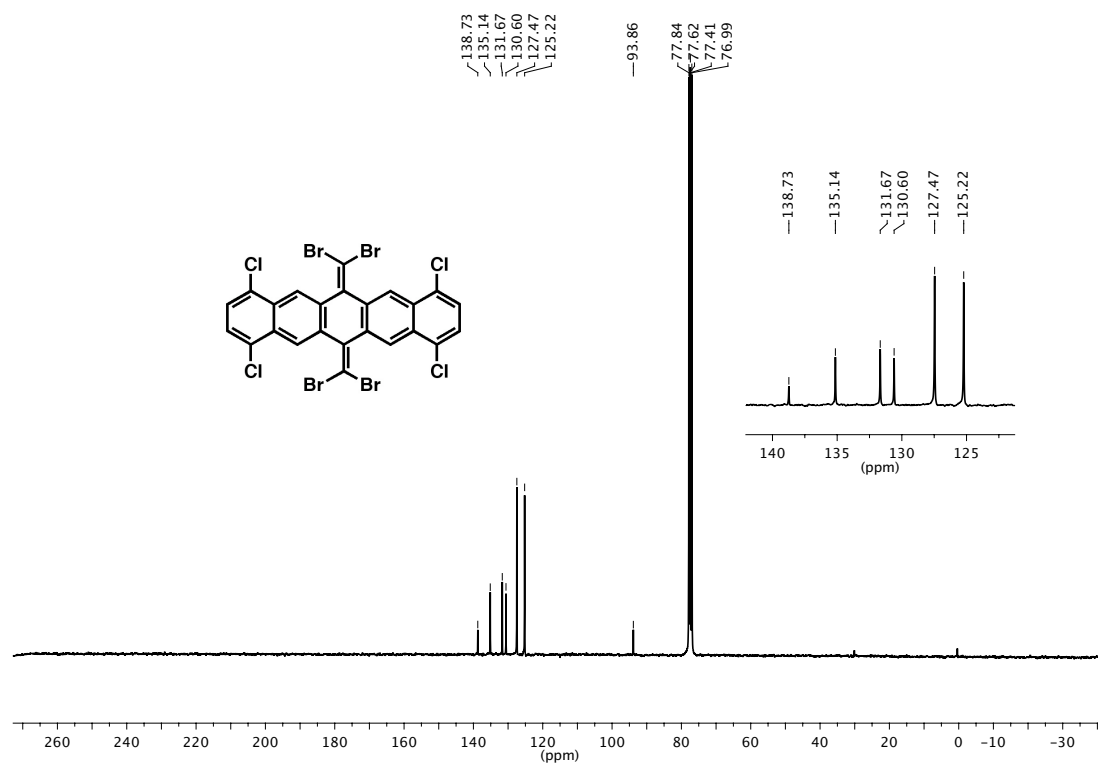

<sup>13</sup>C NMR (CDCl<sub>3</sub>) of S11.

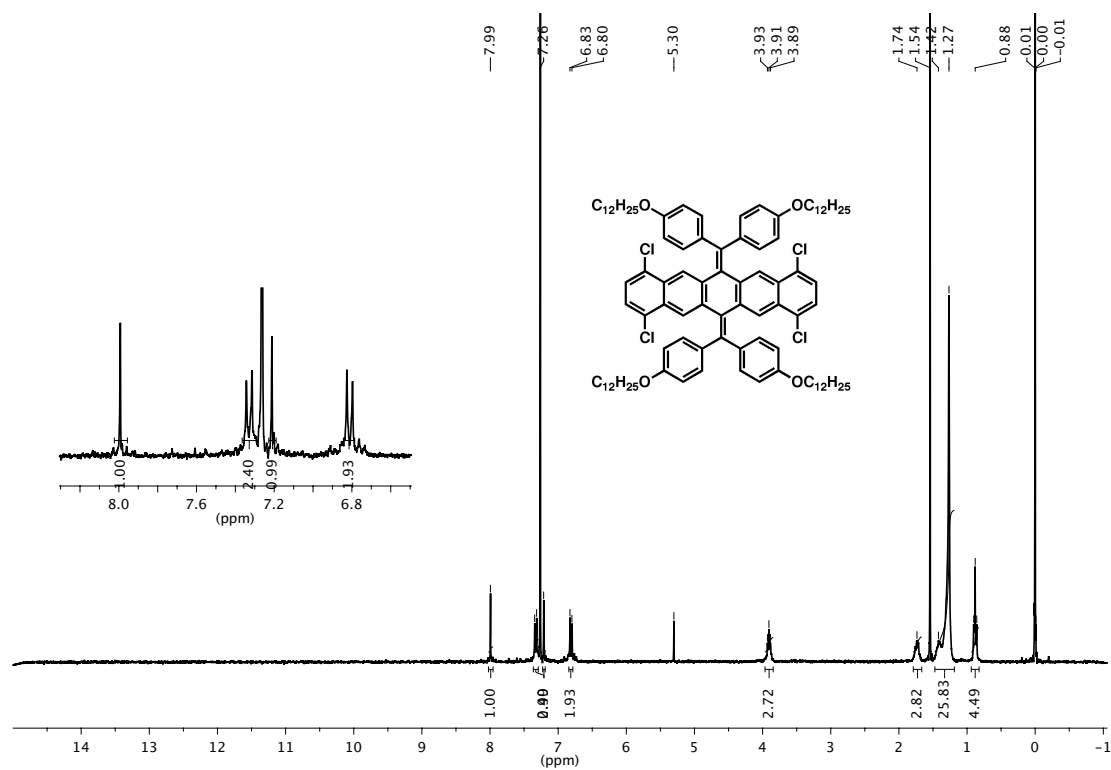

<sup>1</sup>H NMR (CDCl<sub>3</sub>) of S12.

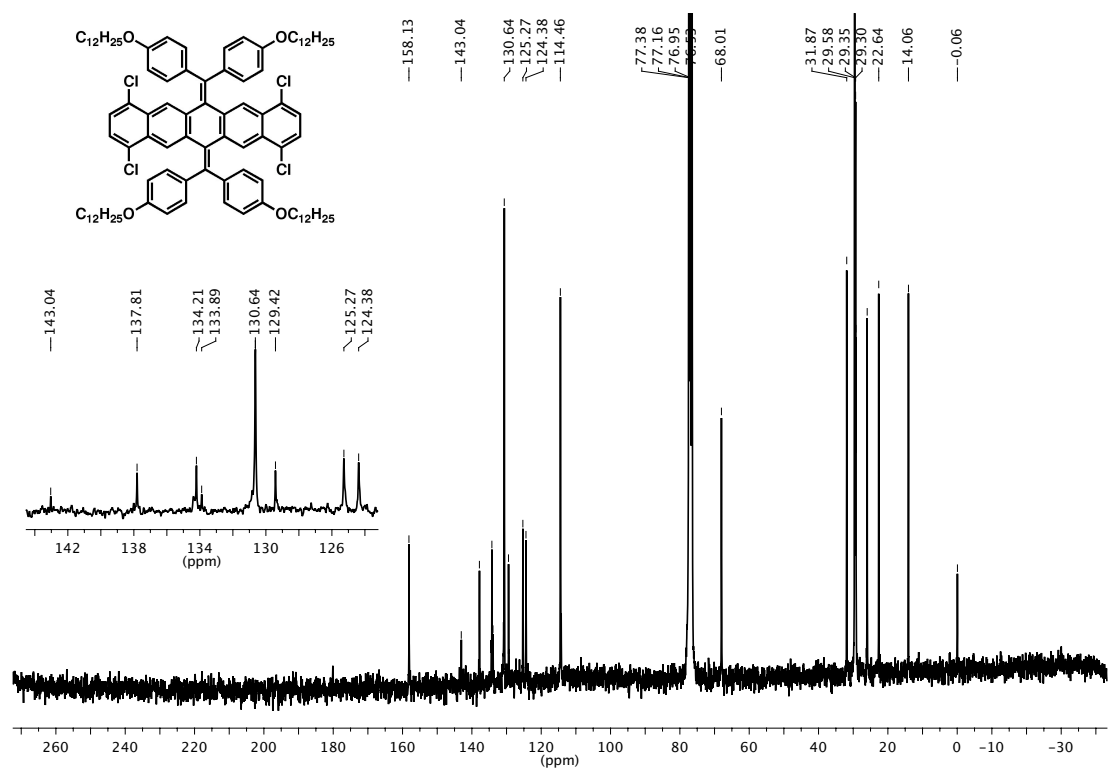

<sup>13</sup>C NMR (CDCl<sub>3</sub>) of S12 .

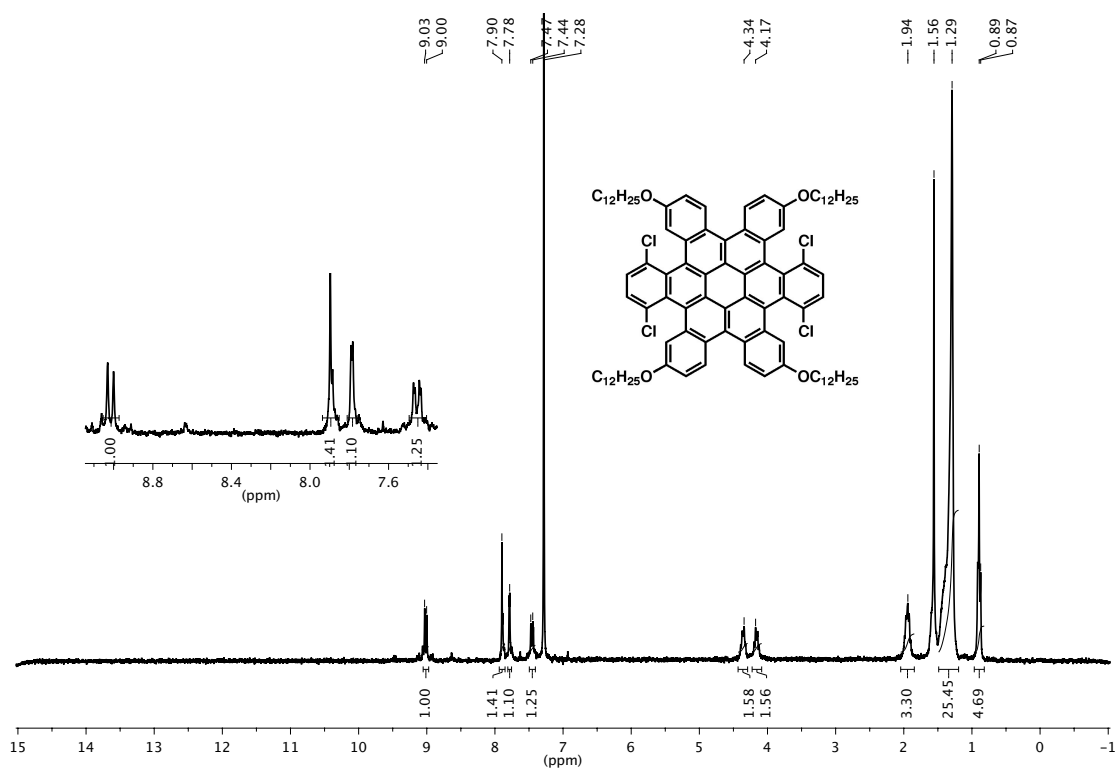

<sup>1</sup>H NMR (CDCl<sub>3</sub>) of S13.

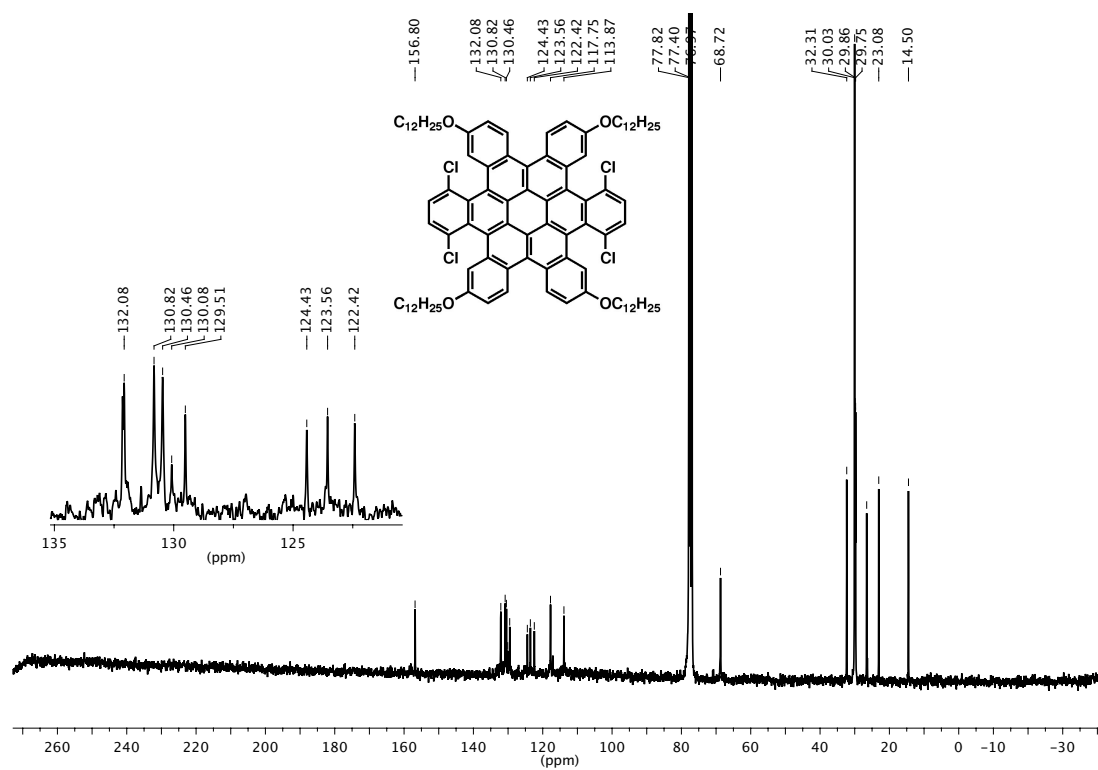

<sup>13</sup>C NMR (CDCl<sub>3</sub>) of S13.

Chemical structure of tetrakis(dodecyloxy)phenanthrene is shown above the spectrum. The structure is a phenanthrene core with four dodecyloxy ( $C_{12}H_{25}O$ ) groups attached at the 1, 3, 6, and 8 positions.

The  $^{13}C$  NMR spectrum displays peaks corresponding to the structure. The chemical shifts (ppm) are listed below the spectrum:

154.21, 139.60, 139.50, 138.83, 137.64, 131.01, 130.83, 128.10, 125.18, 123.12, 69.36, 55.79, 53.73, 53.43, 32.32, 30.15, 30.03, 29.78, 14.25.

<sup>13</sup>C NMR (CD<sub>2</sub>Cl<sub>2</sub>) of S14.



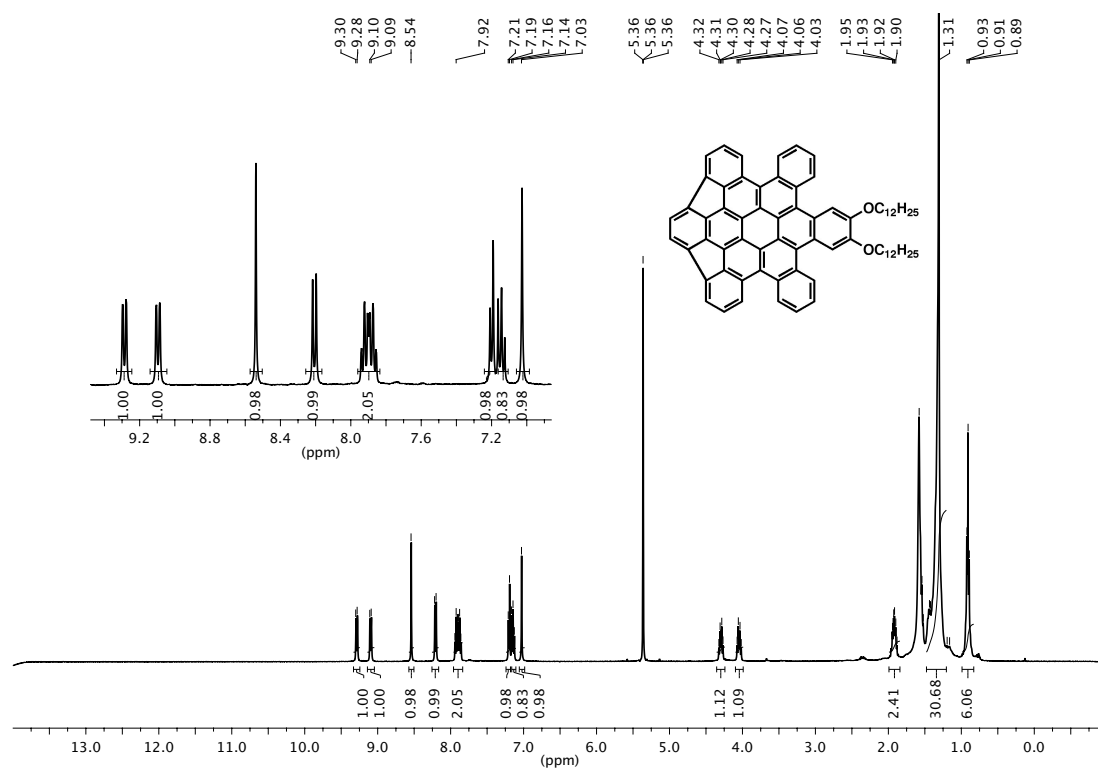

<sup>1</sup>H NMR (CD<sub>2</sub>Cl<sub>2</sub>) of S16.

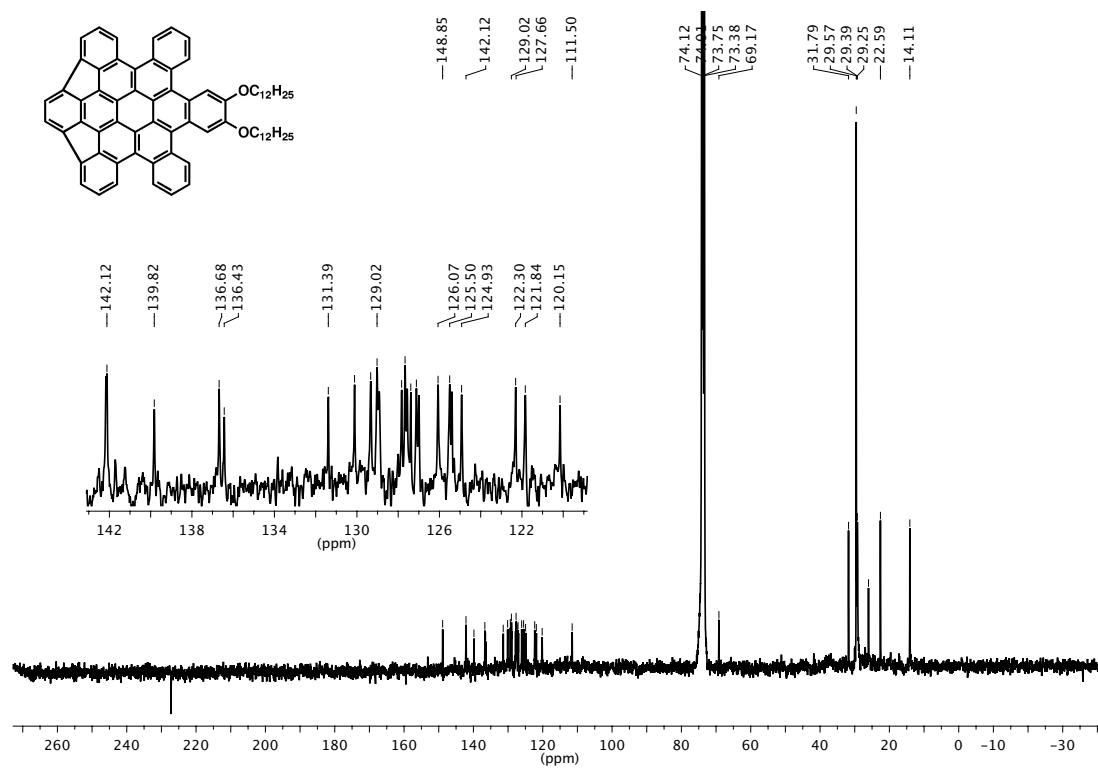

<sup>13</sup>C NMR (CD<sub>2</sub>Cl<sub>2</sub>) of S16.

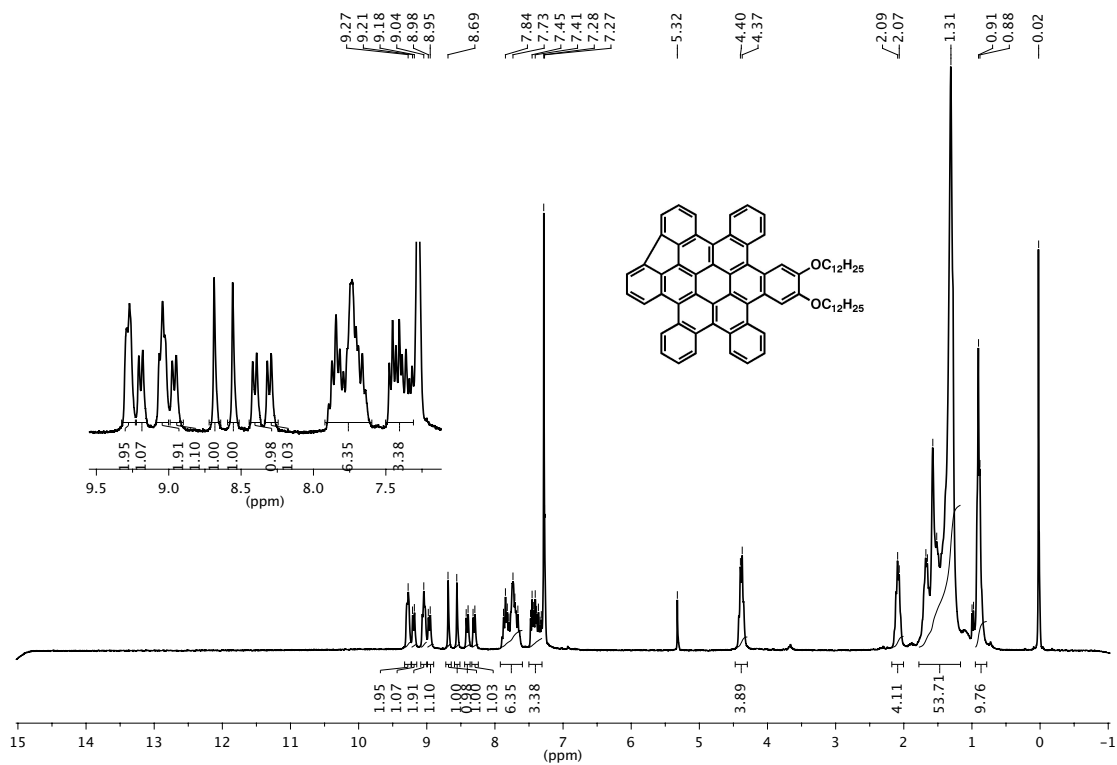

<sup>1</sup>H NMR (CDCl<sub>3</sub>) of S18.

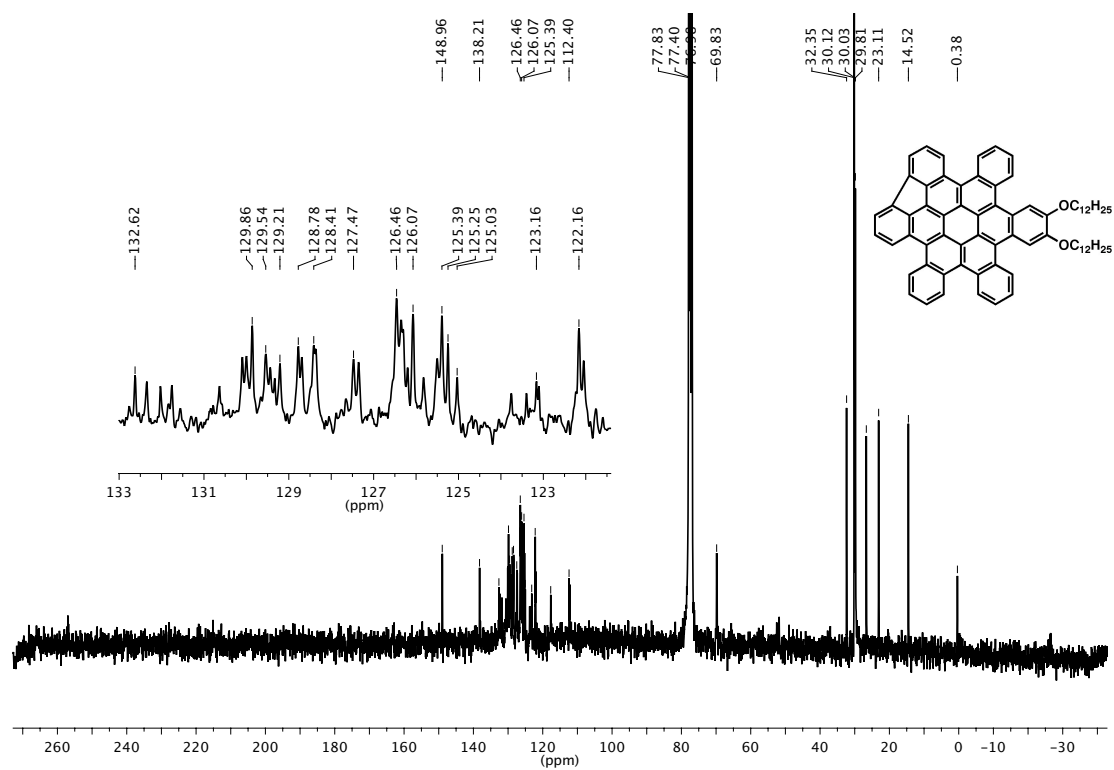

<sup>13</sup>C NMR (CDCl<sub>3</sub>) of S18.



<sup>1</sup>H NMR (CD<sub>2</sub>Cl<sub>2</sub>) of S16.

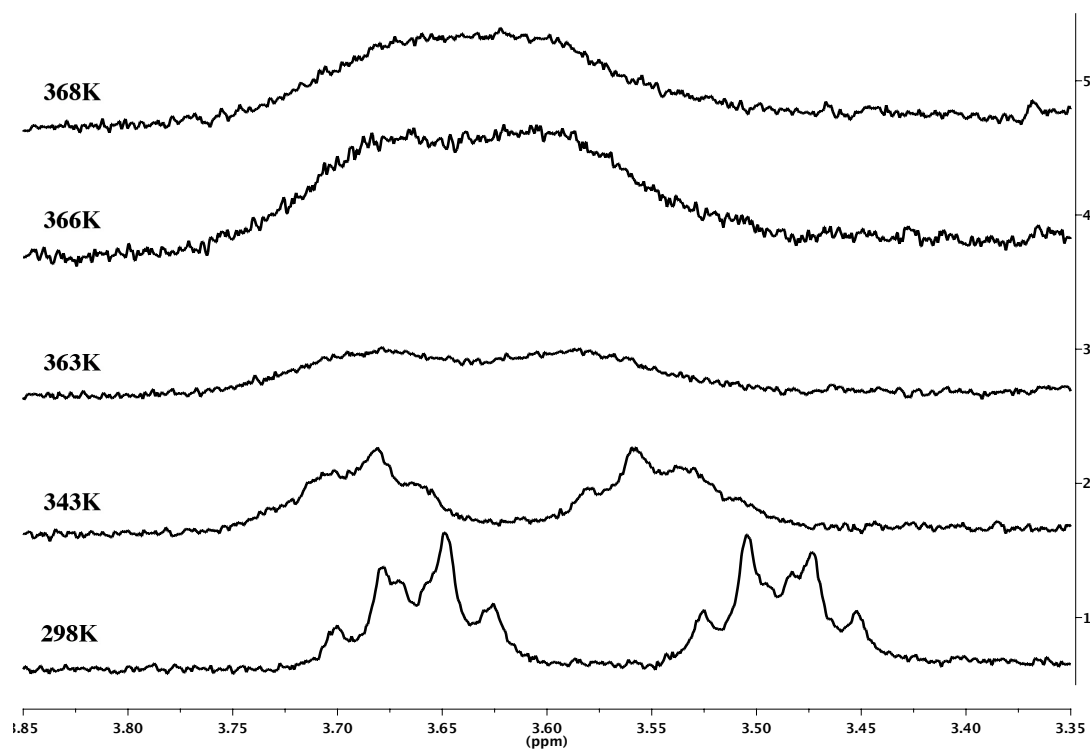

Variable Temperature Experiment (Cl<sub>2</sub>CCDCl<sub>2</sub>) of S16.

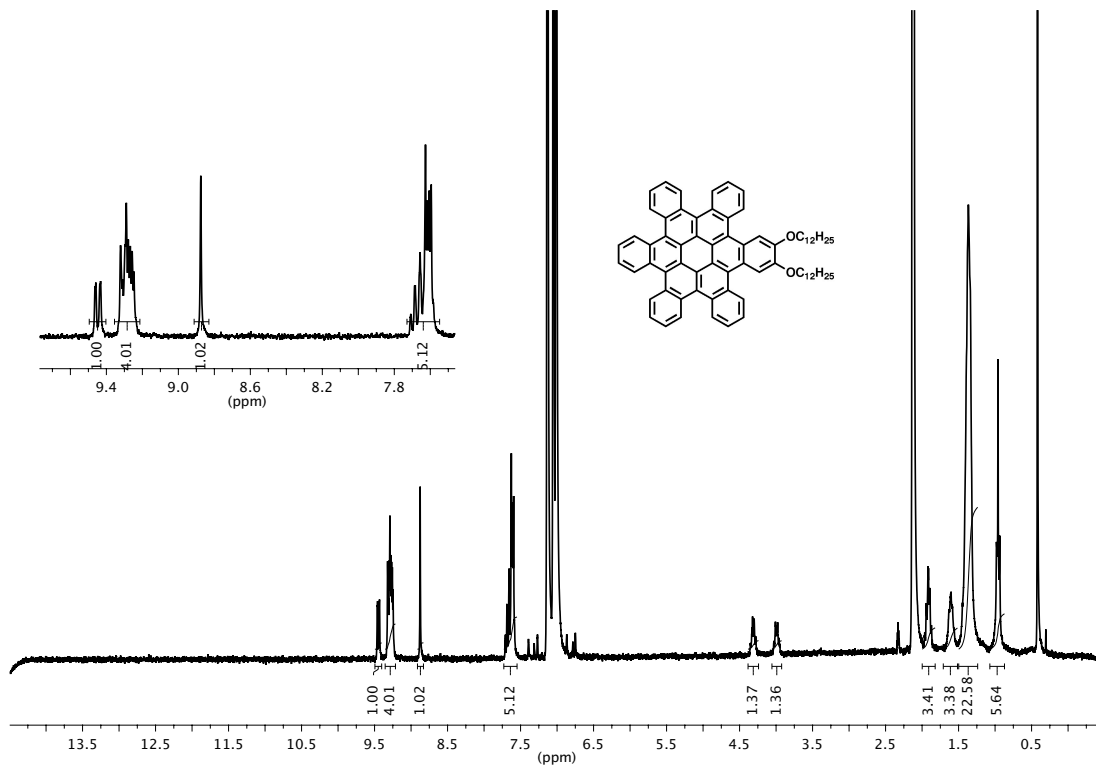<sup>1</sup>H NMR (Cl<sub>2</sub>CDCDCl<sub>2</sub>) of S17.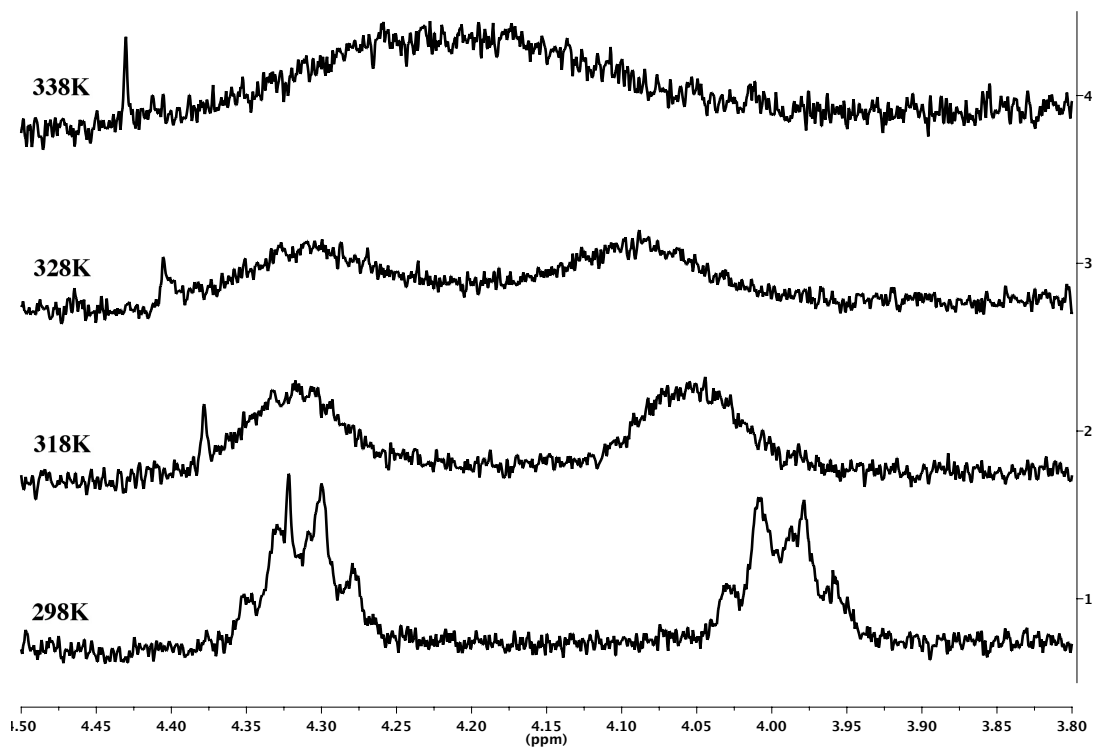

### Variable Temperature Experiment ( $\text{Cl}_2\text{CCDCl}_2$ ) of **S17**.

## **7. References**

- (1) Yazaki, S.; Funahashi, M.; Kato, T. *J. Am. Chem. Soc.* **2008**, *130*, 13206-13207.
- (2) Liu, L.; Yang, B.; Katz, T.; Poindexter, M. K. *J. Org. Chem.* **1991**, *56*, 3769-3775.
- (3) Plunkett, K. N.; Godula, K.; Nuckolls, C.; Tremblay, N.; Whalley, A. C.; Xiao, S. *Org. Lett.* **2009**, *11*, 2225-2228.
- (4) Xiao, S.; Myers, M.; Miao, Q.; Sanaur, S.; Pang, K.; Steigerwald, M. L.; Nuckolls, C. *Angew. Chem. Int. Ed.* **2005**, *44*, 7390-7394.
